# Supplementary material for: Experiments investigating the thermal runaway behavior of cyclically aged lithium batteries at various SOCs
Source: Research Square preprint supplement (doi:10.21203/rs.3.rs-2844083/v1), 2023-05-03
Supplement: Supplementary file 1 [file 790a3ec993992fdd4d6ca7e7.xlsx]

## Sheet: Sheet1
Time(s)	Voltage(V)	Battery surface temperature(℃)	Ejector temperature(℃)	Ambient temperature(℃)	Pressure	Heating plate temperature(℃)	Positive temperature(℃)	Negative temperature(℃)
-577.18	3.6785	15.6	16.9	17.788	104.494	33.1	17.8	15
-577.17	3.678	15.7	16.9	17.7879	104.494	33	17.8	15
-577.16	3.6785	15.6	16.9	17.7879	104.494	33.2	17.7	14.9
-577.15	3.678	15.6	16.9	17.7878	104.494	33.1	17.8	15
-577.14	3.678	15.5	17	17.7878	104.494	33.2	17.8	15
-577.13	3.678	15.6	16.9	17.7877	104.494	33	17.7	15
-577.12	3.6785	15.5	17	17.7877	104.494	33.1	17.7	14.9
-577.11	3.678	15.6	16.9	17.7876	104.494	33.1	17.8	15
-577.1	3.678	15.5	16.9	17.7876	104.494	33.1	17.8	14.9
-577.09	3.678	15.6	17	17.7875	104.493	33	17.8	14.9
-577.08	3.6785	15.5	16.9	17.7874	104.493	33.1	17.7	14.9
-577.07	3.6785	15.7	16.9	17.7874	104.493	33.1	17.8	15
-577.06	3.6785	15.6	16.9	17.7873	104.493	33.1	17.8	14.9
-577.05	3.6775	15.6	16.8	17.7873	104.493	33	17.8	15
-577.04	3.6785	15.5	16.9	17.7872	104.493	33.1	17.7	15
-577.03	3.678	15.6	16.9	17.7872	104.493	33	17.8	15.1
-577.02	3.6785	15.6	16.9	17.7871	104.493	33.2	17.7	14.9
-577.01	3.6785	15.6	16.8	17.787	104.493	33	17.7	15.1
-577	3.678	15.6	16.9	17.7869	104.493	33.1	17.8	15
-576.99	3.6785	15.6	16.9	17.7869	104.493	33	17.8	15.1
-576.98	3.6785	15.6	16.9	17.7868	104.493	33.1	17.7	14.9
-576.97	3.678	15.5	16.9	17.7868	104.492	33	17.8	15
-576.96	3.678	15.5	16.9	17.7867	104.492	33.1	17.7	14.9
-576.95	3.6785	15.6	16.9	17.7867	104.492	33	17.8	15.1
-576.94	3.6785	15.5	16.9	17.7866	104.492	33.2	17.7	15
-576.93	3.6785	15.6	16.9	17.7866	104.492	33	17.8	15
-576.92	3.678	15.7	16.8	17.7865	104.492	33.2	17.7	15
-576.91	3.6785	15.6	16.9	17.7864	104.492	33	17.8	15.1
-576.9	3.678	15.6	16.9	17.7864	104.491	33.1	17.7	14.9
-576.89	3.6785	15.6	16.9	17.7863	104.491	33	17.8	15.1
-576.88	3.678	15.6	16.9	17.7862	104.491	33.1	17.8	14.9
-576.87	3.6785	15.6	16.9	17.7862	104.491	33.1	17.8	15
-576.86	3.678	15.6	16.9	17.7861	104.491	33.1	17.7	14.9
-576.85	3.678	15.6	16.9	17.786	104.491	33	17.8	15
-576.84	3.678	15.6	16.9	17.7859	104.491	33.2	17.7	15
-576.83	3.6785	15.5	16.9	17.7859	104.49	33	17.8	14.9
-576.82	3.6785	15.6	16.9	17.7858	104.49	33.1	17.8	15.1
-576.81	3.6785	15.6	16.9	17.7857	104.49	33	17.8	15
-576.8	3.6785	15.6	17	17.7857	104.49	33.1	17.8	15.1
-576.79	3.6785	15.6	16.9	17.7856	104.49	33	17.8	15
-576.78	3.6785	15.6	16.8	17.7856	104.49	33.1	17.7	15.1
-576.77	3.6785	15.6	16.9	17.7855	104.489	33.1	17.8	14.9
-576.76	3.678	15.5	16.9	17.7855	104.489	33.1	17.8	15.1
-576.75	3.6785	15.7	16.9	17.7854	104.489	33.1	17.8	15
-576.74	3.678	15.6	16.9	17.7853	104.489	33.1	17.7	15.1
-576.73	3.6785	15.6	16.9	17.7853	104.489	33	17.8	15
-576.72	3.678	15.5	16.9	17.7852	104.488	33.1	17.8	15.1
-576.71	3.6785	15.6	16.9	17.7852	104.488	33	17.8	14.9
-576.7	3.678	15.5	16.9	17.7851	104.488	33.1	17.8	15.1
-576.69	3.678	15.7	16.9	17.785	104.488	33	17.7	15
-576.68	3.6785	15.4	16.9	17.785	104.488	33	17.8	15
-576.67	3.678	15.7	16.9	17.7849	104.488	33	17.7	15
-576.66	3.6785	15.5	16.9	17.7848	104.487	33.1	17.7	15
-576.65	3.678	15.7	16.9	17.7848	104.487	33.1	17.8	15
-576.64	3.6785	15.5	16.9	17.7847	104.487	33.1	17.7	15
-576.63	3.678	15.6	16.9	17.7846	104.487	33.1	17.7	15
-576.62	3.678	15.7	16.9	17.7846	104.486	33.1	17.7	14.9
-576.61	3.678	15.5	16.9	17.7845	104.486	32.9	17.8	15
-576.6	3.678	15.5	16.9	17.7844	104.486	33.1	17.7	15
-576.59	3.6785	15.6	16.9	17.7843	104.486	32.9	17.7	15
-576.58	3.678	15.6	16.9	17.7842	104.486	33.1	17.7	15.1
-576.57	3.678	15.5	16.9	17.7842	104.485	33	17.8	15
-576.56	3.679	15.7	16.9	17.7841	104.485	33.2	17.8	15
-576.55	3.6785	15.6	16.9	17.784	104.485	33	17.8	15.1
-576.54	3.678	15.6	16.8	17.784	104.485	33.1	17.7	14.9
-576.53	3.6785	15.6	16.9	17.7839	104.484	33	17.8	15
-576.52	3.6775	15.7	16.8	17.7838	104.484	33	17.8	14.9
-576.51	3.678	15.5	16.9	17.7838	104.484	33.3	17.8	15
-576.5	3.6785	15.6	16.9	17.7837	104.484	33	17.7	15
-576.49	3.678	15.6	16.9	17.7836	104.484	33	17.7	15
-576.48	3.678	15.7	16.9	17.7835	104.483	33.1	17.7	15
-576.47	3.6785	15.6	16.9	17.7834	104.483	33.1	17.8	15.1
-576.46	3.6785	15.5	16.8	17.7833	104.483	32.8	17.8	14.9
-576.45	3.678	15.7	16.9	17.7833	104.483	33.2	17.8	14.9
-576.44	3.678	15.6	16.8	17.7832	104.482	32.8	17.8	15
-576.43	3.678	15.6	16.9	17.7831	104.482	33.2	17.8	15
-576.42	3.6785	15.6	16.9	17.783	104.482	32.9	17.7	14.9
-576.41	3.678	15.7	17	17.7829	104.482	33.1	17.8	14.9
-576.4	3.678	15.5	16.9	17.7829	104.482	33	17.8	15
-576.39	3.678	15.7	16.9	17.7828	104.481	33.2	17.7	14.9
-576.38	3.6785	15.5	16.9	17.7827	104.481	33	17.8	15
-576.37	3.6775	15.7	16.9	17.7826	104.481	33.1	17.8	15.1
-576.36	3.678	15.6	16.9	17.7825	104.481	32.9	17.7	15
-576.35	3.6785	15.7	16.9	17.7824	104.48	33.2	17.8	15.1
-576.34	3.6785	15.6	16.9	17.7824	104.48	32.9	17.7	15
-576.33	3.6785	15.7	16.9	17.7823	104.48	33.2	17.7	15
-576.32	3.6785	15.6	16.9	17.7822	104.48	32.9	17.8	15
-576.31	3.6785	15.5	16.9	17.7821	104.48	33.2	17.8	15
-576.3	3.6785	15.6	16.9	17.7821	104.479	33	17.8	15
-576.29	3.6785	15.6	16.9	17.782	104.479	33.1	17.7	15
-576.28	3.678	15.6	16.9	17.7819	104.479	33	17.7	15
-576.27	3.6785	15.7	16.9	17.7818	104.479	33.1	17.8	15
-576.26	3.6785	15.7	16.9	17.7817	104.479	33.1	17.7	15
-576.25	3.678	15.5	16.9	17.7816	104.479	33	17.8	15
-576.24	3.6785	15.7	17	17.7815	104.478	33	17.8	15
-576.23	3.6775	15.5	16.9	17.7815	104.478	33	17.8	15.1
-576.22	3.6775	15.6	16.9	17.7814	104.478	33	17.8	15
-576.21	3.678	15.6	17	17.7813	104.478	33.1	17.7	15.1
-576.2	3.6785	15.7	16.9	17.7812	104.478	33	17.7	14.9
-576.19	3.678	15.6	16.9	17.7811	104.478	33.1	17.7	15
-576.18	3.6785	15.6	16.9	17.781	104.477	32.9	17.7	14.9
-576.17	3.678	15.6	16.8	17.781	104.477	33.2	17.7	14.9
-576.16	3.678	15.6	16.9	17.7809	104.477	33	17.8	15
-576.15	3.678	15.6	16.9	17.7808	104.477	33	17.8	15
-576.14	3.678	15.6	16.8	17.7807	104.477	33.1	17.7	15
-576.13	3.6785	15.5	16.9	17.7806	104.477	32.9	17.7	15
-576.12	3.678	15.6	16.9	17.7805	104.477	33.1	17.7	15
-576.11	3.678	15.7	16.9	17.7804	104.476	33.1	17.7	15
-576.1	3.678	15.5	16.9	17.7804	104.476	32.9	17.7	14.9
-576.09	3.677	15.6	16.9	17.7803	104.476	33.2	17.7	15
-576.08	3.678	15.6	16.9	17.7802	104.476	33.1	17.8	15
-576.07	3.679	15.6	16.9	17.7801	104.476	33.1	17.7	15
-576.06	3.6785	15.6	16.9	17.78	104.476	33.1	17.8	15
-576.05	3.6785	15.5	16.9	17.7799	104.476	33	17.8	15.1
-576.04	3.6785	15.6	16.9	17.7798	104.476	33.2	17.8	15.1
-576.03	3.6785	15.6	17	17.7797	104.476	32.8	17.8	15.1
-576.02	3.678	15.6	16.9	17.7797	104.476	33.4	17.7	15
-576.01	3.678	15.7	16.9	17.7796	104.476	32.8	17.8	15
-576	3.678	15.6	16.9	17.7795	104.476	33.3	17.7	14.9
-575.99	3.6785	15.7	16.9	17.7794	104.475	32.8	17.8	14.9
-575.98	3.6785	15.6	16.9	17.7793	104.475	33	17.7	15
-575.97	3.6785	15.6	16.9	17.7792	104.475	32.9	17.7	14.9
-575.96	3.6785	15.6	16.9	17.7791	104.475	33.1	17.7	15
-575.95	3.678	15.6	16.9	17.779	104.475	32.7	17.8	14.9
-575.94	3.6775	15.6	16.9	17.7789	104.475	33.3	17.8	14.9
-575.93	3.6785	15.6	16.9	17.7788	104.475	32.8	17.8	15
-575.92	3.6785	15.6	16.9	17.7787	104.475	33.3	17.7	15
-575.91	3.678	15.6	16.9	17.7786	104.475	32.8	17.8	14.9
-575.9	3.6785	15.6	16.9	17.7786	104.475	33.3	17.7	15
-575.89	3.678	15.6	16.8	17.7785	104.475	32.9	17.7	15
-575.88	3.678	15.6	16.9	17.7784	104.475	33.2	17.7	14.9
-575.87	3.678	15.6	16.9	17.7783	104.475	33.1	17.8	15
-575.86	3.678	15.6	16.8	17.7782	104.475	33	17.7	15
-575.85	3.678	15.7	16.9	17.7781	104.475	32.8	17.8	15
-575.84	3.6775	15.5	17	17.778	104.475	33.1	17.7	15
-575.83	3.679	15.5	16.9	17.7779	104.475	33	17.8	15
-575.82	3.6785	15.6	16.9	17.7778	104.475	33.1	17.8	15
-575.81	3.678	15.7	16.9	17.7777	104.475	33	17.8	15
-575.8	3.6785	15.5	16.9	17.7777	104.475	33.2	17.8	14.9
-575.79	3.678	15.6	16.9	17.7776	104.475	32.9	17.8	15
-575.78	3.6785	15.6	16.9	17.7775	104.475	33.1	17.7	15
-575.77	3.678	15.6	17	17.7774	104.475	32.9	17.8	14.9
-575.76	3.678	15.6	16.9	17.7773	104.475	33.2	17.7	15.1
-575.75	3.678	15.6	16.9	17.7772	104.475	32.9	17.8	15
-575.74	3.6785	15.6	16.9	17.7771	104.475	33.2	17.8	15.1
-575.73	3.678	15.6	16.9	17.777	104.475	33	17.8	15
-575.72	3.678	15.6	16.9	17.7769	104.475	33.2	17.7	15
-575.71	3.678	15.6	16.9	17.7768	104.475	32.9	17.8	15
-575.7	3.6785	15.6	16.9	17.7767	104.475	33.1	17.7	15
-575.69	3.6785	15.6	16.9	17.7766	104.475	33	17.7	15
-575.68	3.678	15.5	16.9	17.7765	104.475	33.2	17.7	15
-575.67	3.678	15.6	16.9	17.7764	104.475	32.9	17.7	15
-575.66	3.6785	15.5	16.9	17.7763	104.475	33	17.8	15
-575.65	3.678	15.6	16.9	17.7762	104.475	33	17.7	15
-575.64	3.678	15.6	17	17.7761	104.475	33.1	17.7	15
-575.63	3.678	15.6	16.9	17.776	104.475	33.1	17.7	15
-575.62	3.6785	15.6	16.9	17.7759	104.475	33	17.7	15
-575.61	3.6785	15.5	16.9	17.7758	104.476	33.1	17.8	14.9
-575.6	3.6785	15.6	16.9	17.7757	104.476	33	17.7	15
-575.59	3.678	15.6	16.9	17.7756	104.476	33	17.7	15.1
-575.58	3.6785	15.6	16.9	17.7755	104.476	33	17.7	15
-575.57	3.678	15.6	16.8	17.7754	104.476	33	17.8	15
-575.56	3.6785	15.6	16.9	17.7753	104.476	33	17.8	15
-575.55	3.678	15.6	16.9	17.7752	104.476	33	17.8	15
-575.54	3.6785	15.6	17	17.7751	104.476	32.8	17.7	15
-575.53	3.678	15.6	16.9	17.775	104.476	33.2	17.8	14.9
-575.52	3.678	15.6	16.9	17.7749	104.476	33	17.7	15
-575.51	3.6785	15.6	16.9	17.7748	104.476	33.2	17.8	14.9
-575.5	3.678	15.6	16.9	17.7747	104.476	32.9	17.7	14.9
-575.49	3.678	15.6	16.9	17.7746	104.476	33.1	17.8	14.9
-575.48	3.6785	15.6	16.9	17.7745	104.476	32.9	17.8	14.9
-575.47	3.678	15.6	16.9	17.7744	104.476	33.1	17.8	14.9
-575.46	3.678	15.5	16.9	17.7743	104.476	32.9	17.7	14.9
-575.45	3.6785	15.6	16.9	17.7742	104.476	33.2	17.8	14.9
-575.44	3.678	15.7	16.9	17.7741	104.477	32.9	17.7	15
-575.43	3.6785	15.6	16.9	17.774	104.477	33.2	17.8	15
-575.42	3.678	15.6	16.9	17.7739	104.477	32.8	17.7	14.9
-575.41	3.678	15.6	16.9	17.7738	104.477	33.3	17.7	15
-575.4	3.6785	15.6	16.8	17.7737	104.477	32.8	17.7	14.9
-575.39	3.6775	15.6	16.9	17.7736	104.477	33.3	17.8	15
-575.38	3.678	15.6	16.8	17.7735	104.477	32.9	17.7	14.9
-575.37	3.6785	15.6	16.9	17.7734	104.477	33.2	17.8	15
-575.36	3.6785	15.6	16.9	17.7733	104.477	33	17.7	15
-575.35	3.6785	15.6	16.9	17.7732	104.477	33.2	17.8	15.1
-575.34	3.6785	15.6	16.9	17.7731	104.477	32.8	17.7	15
-575.33	3.678	15.6	16.9	17.773	104.477	33.2	17.7	15.1
-575.32	3.678	15.6	16.9	17.7729	104.477	32.8	17.7	15
-575.31	3.678	15.6	16.9	17.7728	104.477	33.4	17.7	15
-575.3	3.679	15.7	16.9	17.7727	104.477	32.8	17.8	15
-575.29	3.678	15.6	16.9	17.7726	104.477	33.4	17.8	15
-575.28	3.678	15.7	16.9	17.7724	104.478	32.9	17.7	14.9
-575.27	3.6785	15.7	16.9	17.7723	104.478	33.2	17.8	15
-575.26	3.678	15.7	16.9	17.7722	104.478	33	17.8	15
-575.25	3.6785	15.6	16.9	17.7721	104.478	33.1	17.7	15
-575.24	3.678	15.6	16.9	17.772	104.478	33.1	17.7	14.9
-575.23	3.678	15.6	16.9	17.7719	104.478	33.2	17.7	15
-575.22	3.6785	15.6	16.9	17.7718	104.478	32.9	17.7	15
-575.21	3.678	15.6	16.9	17.7717	104.478	33.2	17.7	14.9
-575.2	3.678	15.7	16.9	17.7716	104.478	33	17.7	15
-575.19	3.6775	15.6	16.9	17.7715	104.478	33.2	17.8	15.1
-575.18	3.6785	15.7	16.8	17.7714	104.478	33	17.8	15
-575.17	3.6775	15.5	16.9	17.7713	104.479	33.1	17.8	15
-575.16	3.678	15.7	17	17.7712	104.479	33.1	17.8	14.9
-575.15	3.6775	15.6	16.9	17.7711	104.479	33	17.7	15
-575.14	3.678	15.6	16.8	17.771	104.479	33.3	17.7	15
-575.13	3.6785	15.6	16.9	17.7708	104.479	33	17.8	14.9
-575.12	3.678	15.6	16.9	17.7707	104.479	33.3	17.8	14.9
-575.11	3.678	15.6	16.9	17.7706	104.479	32.9	17.7	15.1
-575.1	3.678	15.5	16.9	17.7705	104.479	33.2	17.8	15.1
-575.09	3.6785	15.6	16.9	17.7704	104.479	33	17.8	14.9
-575.08	3.678	15.5	16.9	17.7703	104.479	33.2	17.8	15.1
-575.07	3.6785	15.6	16.9	17.7702	104.479	32.8	17.7	14.9
-575.06	3.678	15.5	16.9	17.7701	104.48	33.3	17.8	15.1
-575.05	3.6785	15.6	16.9	17.77	104.48	32.8	17.8	15
-575.04	3.678	15.5	16.9	17.7699	104.48	33.5	17.7	14.9
-575.03	3.678	15.6	16.8	17.7698	104.48	32.7	17.7	15
-575.02	3.6785	15.5	16.9	17.7697	104.48	33.5	17.7	15
-575.01	3.6775	15.6	16.9	17.7695	104.48	32.7	17.7	15.1
-575	3.678	15.6	16.9	17.7694	104.48	33.4	17.7	15
-574.99	3.678	15.6	16.9	17.7693	104.48	32.7	17.7	15
-574.98	3.678	15.5	16.9	17.7692	104.48	33.4	17.7	14.9
-574.97	3.6785	15.7	16.9	17.7691	104.48	32.8	17.8	15.1
-574.96	3.678	15.6	16.9	17.769	104.48	33.5	17.8	14.9
-574.95	3.678	15.6	16.9	17.7689	104.48	32.6	17.7	15
-574.94	3.679	15.5	16.9	17.7688	104.48	33.6	17.8	14.9
-574.93	3.6785	15.6	16.8	17.7687	104.48	32.6	17.8	15.1
-574.92	3.678	15.5	16.9	17.7686	104.481	33.7	17.8	15
-574.91	3.6785	15.5	16.9	17.7684	104.481	32.6	17.8	15.1
-574.9	3.678	15.6	16.9	17.7683	104.481	33.6	17.7	14.9
-574.89	3.6785	15.5	16.8	17.7682	104.481	32.6	17.8	15
-574.88	3.678	15.6	17	17.7681	104.481	33.5	17.7	15
-574.87	3.678	15.6	16.9	17.768	104.481	32.7	17.7	15
-574.86	3.6775	15.6	16.9	17.7679	104.481	33.5	17.7	15
-574.85	3.6785	15.5	16.9	17.7678	104.481	32.6	17.7	15
-574.84	3.6785	15.6	16.9	17.7676	104.481	33.4	17.7	15
-574.83	3.6775	15.6	16.8	17.7675	104.481	32.6	17.7	15
-574.82	3.678	15.6	16.9	17.7674	104.481	33.6	17.7	15
-574.81	3.6785	15.6	16.9	17.7673	104.481	32.6	17.8	14.9
-574.8	3.678	15.6	16.8	17.7672	104.481	33.5	17.8	14.9
-574.79	3.678	15.6	16.8	17.7671	104.481	32.7	17.8	15
-574.78	3.678	15.6	16.9	17.7669	104.481	33.3	17.7	15
-574.77	3.6785	15.6	16.8	17.7668	104.482	32.7	17.7	15
-574.76	3.6785	15.6	16.9	17.7667	104.482	33.4	17.7	15
-574.75	3.679	15.6	16.9	17.7666	104.482	32.9	17.7	15
-574.74	3.6785	15.5	16.9	17.7665	104.482	33.3	17.7	15
-574.73	3.678	15.6	16.8	17.7663	104.482	32.8	17.7	15
-574.72	3.6785	15.5	16.9	17.7662	104.482	33.3	17.8	15
-574.71	3.6775	15.6	16.8	17.7661	104.482	32.8	17.7	14.9
-574.7	3.6785	15.6	16.9	17.766	104.482	33.2	17.7	15.1
-574.69	3.6785	15.6	16.9	17.7659	104.482	32.9	17.8	14.9
-574.68	3.6785	15.5	16.9	17.7658	104.482	33.1	17.7	15
-574.67	3.6775	15.6	16.8	17.7656	104.482	33.1	17.7	15
-574.66	3.6785	15.6	16.9	17.7655	104.482	33	17.8	15
-574.65	3.6785	15.6	16.9	17.7654	104.482	33.1	17.7	15
-574.64	3.678	15.6	16.8	17.7653	104.482	32.9	17.7	15
-574.63	3.678	15.6	16.8	17.7651	104.482	33.3	17.7	15
-574.62	3.6785	15.6	17	17.765	104.482	32.8	17.7	15
-574.61	3.6785	15.5	16.8	17.7649	104.482	33.2	17.8	15
-574.6	3.678	15.7	16.8	17.7648	104.482	32.8	17.7	14.9
-574.59	3.6785	15.5	16.8	17.7647	104.482	33.3	17.7	15
-574.58	3.679	15.7	16.8	17.7645	104.482	32.8	17.7	15
-574.57	3.6775	15.4	16.8	17.7644	104.482	33.3	17.8	15
-574.56	3.6785	15.7	16.9	17.7643	104.482	32.7	17.8	15
-574.55	3.6785	15.5	16.9	17.7642	104.482	33.5	17.8	15
-574.54	3.6785	15.7	16.9	17.764	104.482	32.6	17.7	15
-574.53	3.678	15.4	16.8	17.7639	104.482	33.4	17.8	15
-574.52	3.678	15.7	16.8	17.7638	104.482	32.5	17.8	15
-574.51	3.6785	15.5	16.9	17.7637	104.482	33.5	17.7	15
-574.5	3.678	15.6	16.9	17.7636	104.482	32.7	17.7	15
-574.49	3.6785	15.5	16.9	17.7634	104.482	33.6	17.7	14.9
-574.48	3.6785	15.7	16.9	17.7633	104.482	32.5	17.8	14.9
-574.47	3.678	15.5	16.9	17.7632	104.482	33.6	17.8	15.1
-574.46	3.6775	15.6	16.8	17.763	104.482	32.5	17.8	15
-574.45	3.6785	15.5	16.8	17.7629	104.482	33.6	17.7	15
-574.44	3.678	15.6	16.9	17.7628	104.482	32.5	17.7	14.9
-574.43	3.678	15.6	16.9	17.7627	104.482	33.6	17.7	14.9
-574.42	3.6785	15.6	16.9	17.7625	104.482	32.6	17.8	15
-574.41	3.6785	15.6	16.9	17.7624	104.482	33.5	17.8	15
-574.4	3.678	15.5	16.8	17.7623	104.482	32.5	17.8	14.9
-574.39	3.678	15.6	16.9	17.7622	104.482	33.5	17.8	14.9
-574.38	3.678	15.6	16.9	17.762	104.482	32.6	17.7	15
-574.37	3.678	15.6	16.9	17.7619	104.482	33.6	17.7	15.1
-574.36	3.6785	15.6	16.9	17.7618	104.482	32.6	17.8	14.9
-574.35	3.6785	15.7	16.8	17.7617	104.482	33.4	17.8	15
-574.34	3.6775	15.5	16.8	17.7615	104.482	32.8	17.7	14.9
-574.33	3.6785	15.6	16.8	17.7614	104.482	33.3	17.7	15
-574.32	3.678	15.5	16.9	17.7613	104.482	32.8	17.7	14.9
-574.31	3.6785	15.6	16.9	17.7611	104.482	33.3	17.8	15
-574.3	3.678	15.6	16.9	17.761	104.482	32.8	17.7	15
-574.29	3.678	15.5	16.8	17.7609	104.482	33.3	17.8	14.9
-574.28	3.6785	15.7	16.9	17.7607	104.482	33	17.8	14.9
-574.27	3.6785	15.6	16.9	17.7606	104.482	33.1	17.8	14.9
-574.26	3.678	15.6	16.9	17.7605	104.482	33	17.8	15
-574.25	3.678	15.6	16.9	17.7603	104.482	33.2	17.7	15
-574.24	3.6785	15.6	16.8	17.7602	104.482	32.9	17.7	14.9
-574.23	3.678	15.6	16.9	17.7601	104.482	33.2	17.8	15.1
-574.22	3.678	15.5	16.9	17.7599	104.482	33	17.7	14.9
-574.21	3.678	15.6	16.9	17.7598	104.481	33.1	17.7	15
-574.2	3.678	15.5	16.9	17.7597	104.481	33	17.7	15
-574.19	3.678	15.6	16.9	17.7595	104.481	33.3	17.8	14.9
-574.18	3.678	15.5	16.9	17.7594	104.481	32.9	17.7	14.9
-574.17	3.678	15.6	16.9	17.7593	104.481	33.3	17.7	15
-574.16	3.6785	15.6	16.9	17.7591	104.481	32.9	17.7	15
-574.15	3.678	15.5	16.9	17.759	104.481	33.3	17.8	15
-574.14	3.678	15.6	16.9	17.7588	104.481	33	17.7	14.9
-574.13	3.6785	15.6	16.9	17.7587	104.481	33.2	17.8	15
-574.12	3.6775	15.5	16.9	17.7586	104.481	33	17.8	14.9
-574.11	3.6785	15.6	16.9	17.7584	104.481	33.1	17.7	14.9
-574.1	3.678	15.5	16.9	17.7583	104.481	33.1	17.7	15
-574.09	3.678	15.5	16.8	17.7582	104.481	33.1	17.8	15
-574.08	3.6785	15.5	16.9	17.758	104.481	33.1	17.7	15
-574.07	3.6785	15.6	16.9	17.7579	104.481	33.2	17.7	15.1
-574.06	3.678	15.6	16.9	17.7577	104.481	33	17.8	14.9
-574.05	3.678	15.5	16.8	17.7576	104.481	33	17.8	15
-574.04	3.678	15.6	16.9	17.7575	104.481	33.1	17.7	14.9
-574.03	3.6785	15.5	16.9	17.7573	104.481	33	17.8	15
-574.02	3.6785	15.6	16.9	17.7572	104.48	33.2	17.7	14.9
-574.01	3.6785	15.5	16.9	17.7571	104.48	33	17.7	14.9
-574	3.678	15.5	16.9	17.7569	104.48	33.3	17.8	15
-573.99	3.678	15.6	16.9	17.7568	104.48	33	17.7	15
-573.98	3.678	15.6	16.9	17.7566	104.48	33.3	17.7	15.1
-573.97	3.678	15.6	16.9	17.7565	104.48	33	17.7	15.1
-573.96	3.678	15.6	16.9	17.7564	104.48	33.3	17.7	15
-573.95	3.6775	15.6	16.9	17.7562	104.48	32.8	17.8	15
-573.94	3.6775	15.6	16.9	17.7561	104.48	33.5	17.7	15
-573.93	3.678	15.6	17	17.7559	104.48	32.9	17.7	15
-573.92	3.678	15.6	16.9	17.7558	104.48	33.1	17.7	14.8
-573.91	3.678	15.6	16.9	17.7557	104.48	32.9	17.7	15.1
-573.9	3.6775	15.6	16.9	17.7555	104.48	33.4	17.7	15
-573.89	3.6785	15.6	16.9	17.7554	104.48	32.7	17.7	15
-573.88	3.6785	15.5	16.9	17.7552	104.48	33.3	17.7	15
-573.87	3.6785	15.6	16.8	17.7551	104.48	32.8	17.7	15
-573.86	3.6785	15.6	16.9	17.755	104.48	33.4	17.7	14.9
-573.85	3.678	15.7	16.8	17.7548	104.48	32.7	17.7	15
-573.84	3.6785	15.5	16.9	17.7547	104.48	33.3	17.8	15
-573.83	3.678	15.6	16.8	17.7546	104.48	32.8	17.7	15
-573.82	3.678	15.5	16.9	17.7544	104.48	33.3	17.7	14.9
-573.81	3.678	15.6	16.9	17.7543	104.48	32.8	17.7	14.9
-573.8	3.678	15.5	16.9	17.7542	104.48	33.3	17.7	14.9
-573.79	3.678	15.5	16.9	17.754	104.48	32.8	17.7	15
-573.78	3.6785	15.5	16.9	17.7539	104.48	33.4	17.7	14.9
-573.77	3.678	15.6	16.9	17.7537	104.48	33.1	17.7	15
-573.76	3.6775	15.6	16.9	17.7536	104.48	33	17.8	14.9
-573.75	3.678	15.5	16.9	17.7535	104.48	32.9	17.7	15
-573.74	3.678	15.6	16.8	17.7533	104.48	33.2	17.7	14.9
-573.73	3.6775	15.6	16.9	17.7532	104.48	33	17.7	14.9
-573.72	3.678	15.6	16.8	17.753	104.48	33.2	17.6	14.9
-573.71	3.678	15.6	16.9	17.7529	104.48	33.3	17.7	15
-573.7	3.678	15.6	16.9	17.7528	104.48	32.9	17.7	14.9
-573.69	3.678	15.6	16.9	17.7526	104.48	33	17.7	14.9
-573.68	3.6775	15.5	16.9	17.7525	104.48	33.2	17.8	14.9
-573.67	3.6785	15.5	16.8	17.7523	104.48	33.2	17.7	15
-573.66	3.6775	15.6	16.9	17.7522	104.48	33.1	17.8	14.9
-573.65	3.6775	15.5	16.9	17.752	104.48	33.5	17.8	15
-573.64	3.6785	15.5	16.9	17.7519	104.48	32.8	17.7	15
-573.63	3.678	15.6	16.9	17.7517	104.48	33.4	17.7	15
-573.62	3.678	15.5	16.9	17.7516	104.48	32.8	17.7	14.9
-573.61	3.6775	15.6	16.9	17.7515	104.48	33.3	17.7	14.9
-573.6	3.6785	15.6	16.8	17.7513	104.48	32.9	17.7	14.9
-573.59	3.6785	15.6	16.9	17.7512	104.48	33.5	17.8	15
-573.58	3.678	15.6	17	17.7511	104.48	32.7	17.7	15
-573.57	3.678	15.6	16.8	17.7509	104.48	33.6	17.7	14.9
-573.56	3.678	15.6	16.9	17.7508	104.48	32.7	17.7	14.9
-573.55	3.6785	15.6	16.9	17.7506	104.48	33.6	17.7	14.9
-573.54	3.6785	15.5	16.9	17.7505	104.48	32.7	17.8	14.9
-573.53	3.6785	15.5	16.9	17.7503	104.48	33.6	17.7	15
-573.52	3.6785	15.5	16.9	17.7502	104.48	32.8	17.7	15
-573.51	3.6785	15.5	16.9	17.75	104.48	33.2	17.7	15.1
-573.5	3.6785	15.5	16.9	17.7499	104.48	32.9	17.8	14.9
-573.49	3.678	15.6	16.8	17.7497	104.48	33.7	17.7	14.9
-573.48	3.678	15.5	17	17.7496	104.48	32.7	17.7	15
-573.47	3.6785	15.6	16.9	17.7494	104.48	33.1	17.7	15
-573.46	3.678	15.6	17	17.7493	104.48	32.8	17.8	14.9
-573.45	3.678	15.6	16.9	17.7491	104.48	33.2	17.7	14.9
-573.44	3.6785	15.6	16.9	17.749	104.48	32.9	17.7	14.9
-573.43	3.6785	15.6	16.9	17.7489	104.48	33.6	17.8	15
-573.42	3.678	15.5	16.9	17.7487	104.48	32.7	17.8	14.9
-573.41	3.678	15.6	16.9	17.7486	104.48	33.1	17.7	15
-573.4	3.6775	15.6	16.9	17.7484	104.48	33	17.7	14.9
-573.39	3.678	15.5	16.9	17.7483	104.48	32.9	17.7	14.9
-573.38	3.678	15.6	16.9	17.7481	104.48	33.1	17.7	14.9
-573.37	3.6785	15.6	17	17.748	104.48	33	17.8	15
-573.36	3.678	15.5	17	17.7479	104.48	33	17.6	14.9
-573.35	3.678	15.5	16.9	17.7477	104.48	32.8	17.7	15
-573.34	3.6775	15.6	17	17.7476	104.48	33.5	17.7	14.9
-573.33	3.678	15.5	16.9	17.7474	104.48	33	17.7	15
-573.32	3.6785	15.6	17	17.7473	104.48	33.1	17.7	14.9
-573.31	3.678	15.5	16.9	17.7471	104.48	31.8	17.7	15
-573.3	3.678	15.6	16.9	17.747	104.48	34.5	17.7	14.9
-573.29	3.6775	15.6	16.8	17.7468	104.48	32.1	17.8	14.9
-573.28	3.6785	15.5	16.9	17.7467	104.48	34.5	17.7	14.9
-573.27	3.678	15.6	16.9	17.7465	104.48	32.4	17.7	15
-573.26	3.678	15.5	16.8	17.7464	104.48	33.2	17.7	15
-573.25	3.6785	15.6	16.9	17.7462	104.48	32.7	17.7	14.9
-573.24	3.678	15.6	16.9	17.7461	104.48	33.8	17.8	15
-573.23	3.6775	15.6	16.9	17.746	104.48	32	17.7	14.9
-573.22	3.678	15.5	16.9	17.7458	104.48	34.4	17.8	14.9
-573.21	3.678	15.5	16.9	17.7457	104.48	32.5	17.7	15
-573.2	3.6785	15.6	16.9	17.7456	104.48	34.5	17.7	15
-573.19	3.678	15.5	16.9	17.7454	104.48	33.4	17.7	15
-573.18	3.678	15.6	16.9	17.7453	104.48	32.4	17.7	15
-573.17	3.6785	15.7	17	17.7451	104.48	33.1	17.8	15
-573.16	3.678	15.6	16.9	17.745	104.48	32.8	17.7	15
-573.15	3.6785	15.5	16.8	17.7448	104.48	32.6	17.8	15
-573.14	3.6785	15.6	16.9	17.7447	104.48	33.2	17.7	15
-573.13	3.679	15.5	16.9	17.7446	104.48	34.2	17.7	15
-573.12	3.678	15.6	16.9	17.7444	104.48	32.3	17.7	15
-573.11	3.678	15.6	16.9	17.7443	104.48	33.1	17.8	15
-573.1	3.6785	15.6	16.9	17.7441	104.48	32.7	17.8	14.9
-573.09	3.678	15.6	16.9	17.744	104.48	34.2	17.7	15
-573.08	3.678	15.6	16.9	17.7439	104.48	32	17.7	14.9
-573.07	3.678	15.6	16.9	17.7437	104.48	34.3	17.7	15
-573.06	3.6785	15.6	16.8	17.7436	104.48	32.1	17.7	15
-573.05	3.6785	15.6	16.9	17.7434	104.48	33.9	17.8	15
-573.04	3.6785	15.5	16.9	17.7433	104.48	32.6	17.7	15.1
-573.03	3.6775	15.5	16.8	17.7431	104.48	33.4	17.7	15
-573.02	3.678	15.6	16.9	17.743	104.48	32.5	17.7	15
-573.01	3.6785	15.6	16.9	17.7428	104.48	33.6	17.7	15.1
-573	3.6785	15.6	16.9	17.7427	104.48	32.8	17.7	15
-572.99	3.678	15.6	16.8	17.7426	104.48	33.3	17.7	15
-572.98	3.6785	15.6	16.8	17.7424	104.48	33	17.8	15
-572.97	3.6785	15.6	16.9	17.7423	104.48	33.1	17.8	15
-572.96	3.678	15.6	16.9	17.7422	104.48	33	17.7	15
-572.95	3.678	15.6	16.9	17.742	104.48	33	17.7	15
-572.94	3.678	15.6	16.9	17.7419	104.48	33.1	17.7	15
-572.93	3.678	15.6	16.8	17.7418	104.48	33.2	17.8	15
-572.92	3.6785	15.6	16.9	17.7416	104.48	33	17.7	15
-572.91	3.678	15.6	16.9	17.7415	104.48	33.2	17.8	14.9
-572.9	3.678	15.5	17	17.7413	104.48	33	17.7	15
-572.89	3.678	15.7	16.8	17.7412	104.48	33.1	17.7	15
-572.88	3.678	15.5	16.9	17.7411	104.48	33.2	17.7	15
-572.87	3.678	15.7	16.9	17.7409	104.48	33.3	17.7	15
-572.86	3.678	15.5	16.9	17.7408	104.48	33	17.7	15
-572.85	3.6785	15.6	16.8	17.7407	104.48	33.1	17.7	15
-572.84	3.6775	15.5	16.9	17.7405	104.48	33.1	17.7	15
-572.83	3.6785	15.6	16.9	17.7404	104.48	33.1	17.6	15
-572.82	3.6775	15.5	16.9	17.7402	104.48	33	17.7	14.9
-572.81	3.678	15.5	16.8	17.7401	104.48	33.3	17.8	15
-572.8	3.6785	15.6	16.9	17.74	104.48	33.1	17.8	14.9
-572.79	3.6785	15.6	16.9	17.7398	104.48	33	17.7	15.1
-572.78	3.678	15.6	16.9	17.7397	104.48	33.1	17.8	15
-572.77	3.678	15.6	16.9	17.7395	104.48	33.1	17.7	15.1
-572.76	3.678	15.6	16.9	17.7394	104.48	33.2	17.6	15
-572.75	3.678	15.6	16.9	17.7393	104.48	33.1	17.7	15.1
-572.74	3.678	15.6	16.8	17.7391	104.48	33.1	17.7	15
-572.73	3.6785	15.6	16.8	17.739	104.48	33.1	17.7	15.1
-572.72	3.6775	15.6	16.9	17.7389	104.48	33.2	17.7	15.1
-572.71	3.678	15.5	16.9	17.7388	104.48	33.1	17.8	15.1
-572.7	3.6785	15.6	16.9	17.7386	104.48	33.2	17.7	15
-572.69	3.678	15.6	16.9	17.7385	104.48	33	17.7	15
-572.68	3.6785	15.6	16.8	17.7383	104.48	33.2	17.8	14.9
-572.67	3.6785	15.5	16.8	17.7382	104.48	33.1	17.7	15.1
-572.66	3.678	15.6	16.9	17.7381	104.48	33.2	17.7	14.9
-572.65	3.678	15.6	16.9	17.738	104.48	33.1	17.8	15
-572.64	3.6785	15.6	16.9	17.7378	104.48	33.2	17.8	14.9
-572.63	3.678	15.5	16.9	17.7377	104.48	32.9	17.7	15
-572.62	3.6785	15.5	16.9	17.7376	104.48	33.2	17.7	14.9
-572.61	3.678	15.5	16.9	17.7374	104.48	33.1	17.8	15
-572.6	3.6785	15.6	16.9	17.7373	104.48	33.2	17.7	14.9
-572.59	3.678	15.6	16.8	17.7372	104.48	33	17.7	15.1
-572.58	3.6785	15.6	16.9	17.737	104.48	33.1	17.8	15
-572.57	3.678	15.6	16.8	17.7369	104.479	33.1	17.7	15
-572.56	3.6785	15.6	16.9	17.7368	104.479	33.2	17.7	14.9
-572.55	3.678	15.6	16.9	17.7367	104.479	33	17.7	15.1
-572.54	3.678	15.6	16.9	17.7365	104.479	33.2	17.7	14.9
-572.53	3.678	15.6	16.9	17.7364	104.479	33	17.7	15
-572.52	3.6785	15.6	17	17.7363	104.479	33.1	17.7	14.9
-572.51	3.678	15.7	16.8	17.7361	104.479	33	17.7	15
-572.5	3.678	15.6	16.9	17.736	104.479	33.3	17.7	15
-572.49	3.6785	15.6	16.9	17.7359	104.479	33	17.8	15
-572.48	3.6785	15.6	16.9	17.7358	104.479	33.2	17.7	14.9
-572.47	3.678	15.6	16.9	17.7356	104.479	32.9	17.7	15.1
-572.46	3.6785	15.6	16.9	17.7355	104.479	33.3	17.7	15
-572.45	3.678	15.6	16.9	17.7354	104.479	33	17.8	15
-572.44	3.6775	15.6	16.9	17.7353	104.479	33.2	17.7	14.9
-572.43	3.678	15.6	16.9	17.7351	104.479	33	17.7	15
-572.42	3.678	15.6	16.9	17.735	104.478	33.2	17.7	14.9
-572.41	3.678	15.6	16.9	17.7349	104.478	33.1	17.7	15.1
-572.4	3.6775	15.6	16.9	17.7347	104.478	33.3	17.7	14.9
-572.39	3.6775	15.6	16.8	17.7346	104.478	33	17.7	15
-572.38	3.678	15.6	16.9	17.7345	104.478	33.3	17.7	15
-572.37	3.6785	15.6	16.8	17.7343	104.478	32.9	17.7	15.1
-572.36	3.678	15.6	16.9	17.7342	104.478	33.3	17.7	15
-572.35	3.678	15.6	16.9	17.7341	104.478	33	17.8	14.9
-572.34	3.6785	15.6	16.9	17.734	104.478	33.2	17.7	15
-572.33	3.6785	15.6	16.9	17.7338	104.478	33	17.7	14.9
-572.32	3.678	15.6	16.9	17.7337	104.478	33.2	17.7	14.9
-572.31	3.6785	15.5	16.9	17.7336	104.478	33	17.7	15
-572.3	3.6775	15.6	16.9	17.7335	104.478	33.2	17.8	15
-572.29	3.678	15.6	16.9	17.7333	104.478	33	17.7	15
-572.28	3.678	15.6	16.8	17.7332	104.478	33.2	17.7	15
-572.27	3.678	15.6	16.9	17.7331	104.478	33	17.7	14.9
-572.26	3.6785	15.6	16.9	17.733	104.478	33.3	17.7	15
-572.25	3.678	15.6	16.9	17.7329	104.478	33.1	17.8	14.9
-572.24	3.6785	15.6	16.9	17.7327	104.478	33.1	17.7	15.1
-572.23	3.6785	15.6	16.9	17.7326	104.478	33.2	17.8	15
-572.22	3.678	15.5	16.9	17.7325	104.478	33.2	17.7	15
-572.21	3.678	15.6	16.9	17.7324	104.478	33.1	17.8	14.9
-572.2	3.6785	15.6	16.9	17.7323	104.478	33.1	17.7	14.9
-572.19	3.6785	15.5	16.9	17.7322	104.478	33.2	17.8	15.1
-572.18	3.678	15.6	16.9	17.732	104.478	33.1	17.7	15
-572.17	3.678	15.6	16.9	17.7319	104.477	33.2	17.7	14.9
-572.16	3.6785	15.6	16.9	17.7318	104.477	33	17.7	14.9
-572.15	3.678	15.7	16.9	17.7317	104.477	33.1	17.8	15.1
-572.14	3.6775	15.6	16.9	17.7316	104.477	33	17.8	14.9
-572.13	3.678	15.6	16.8	17.7314	104.477	33.1	17.7	15.1
-572.12	3.678	15.6	16.9	17.7313	104.477	33	17.7	14.9
-572.11	3.678	15.5	16.9	17.7312	104.477	33.2	17.7	15
-572.1	3.678	15.5	16.9	17.7311	104.477	33	17.7	14.9
-572.09	3.678	15.6	16.9	17.731	104.477	33.2	17.7	15.1
-572.08	3.678	15.6	16.9	17.7309	104.477	33	17.7	15
-572.07	3.678	15.5	16.9	17.7308	104.477	33.2	17.7	14.9
-572.06	3.678	15.6	16.8	17.7306	104.477	33	17.7	14.9
-572.05	3.678	15.6	16.9	17.7305	104.477	33.2	17.8	15.1
-572.04	3.678	15.6	17	17.7304	104.477	33	17.8	15.1
-572.03	3.678	15.6	16.9	17.7302	104.477	33.2	17.7	14.9
-572.02	3.6775	15.6	16.9	17.7301	104.477	33	17.7	15.1
-572.01	3.6785	15.6	16.9	17.73	104.477	33.2	17.7	14.9
-572	3.678	15.6	17	17.7299	104.477	33	17.7	15.1
-571.99	3.678	15.6	16.9	17.7298	104.477	33.3	17.7	14.9
-571.98	3.678	15.6	16.9	17.7297	104.477	33	17.8	15
-571.97	3.6785	15.6	16.9	17.7296	104.477	33.2	17.7	14.9
-571.96	3.6785	15.5	16.9	17.7295	104.476	32.9	17.7	15.1
-571.95	3.678	15.7	17	17.7293	104.476	33.1	17.7	14.9
-571.94	3.678	15.6	16.9	17.7292	104.476	32.9	17.8	15
-571.93	3.678	15.6	16.8	17.7291	104.476	33.2	17.8	15.1
-571.92	3.6775	15.6	17	17.729	104.476	33	17.8	15.1
-571.91	3.678	15.6	16.9	17.7289	104.476	33.1	17.8	14.9
-571.9	3.6785	15.6	16.9	17.7288	104.476	33	17.7	14.8
-571.89	3.678	15.6	16.9	17.7287	104.476	33.2	17.7	15.2
-571.88	3.678	15.6	16.9	17.7286	104.476	33	17.7	14.8
-571.87	3.678	15.6	16.9	17.7284	104.476	33.1	17.7	15.2
-571.86	3.6785	15.6	16.9	17.7283	104.476	33	17.8	15
-571.85	3.678	15.6	16.9	17.7282	104.476	33.2	17.8	14.9
-571.84	3.6785	15.6	16.9	17.7281	104.476	32.9	17.7	14.9
-571.83	3.679	15.6	16.9	17.728	104.476	33.2	17.7	15.2
-571.82	3.678	15.6	16.9	17.7279	104.476	33.1	17.7	14.9
-571.81	3.678	15.5	16.9	17.7278	104.476	33.1	17.8	15.1
-571.8	3.6785	15.6	16.9	17.7277	104.475	33	17.7	14.9
-571.79	3.6775	15.5	16.9	17.7276	104.475	33.1	17.8	15
-571.78	3.678	15.5	16.8	17.7275	104.475	33.1	17.7	14.9
-571.77	3.678	15.5	16.9	17.7273	104.475	33	17.7	15
-571.76	3.678	15.6	16.9	17.7273	104.475	33	17.8	15
-571.75	3.6785	15.6	16.9	17.7272	104.475	33.1	17.7	14.9
-571.74	3.678	15.6	16.9	17.7271	104.475	33.2	17.7	14.8
-571.73	3.6785	15.6	16.9	17.727	104.475	33	17.7	15.2
-571.72	3.678	15.5	16.9	17.7269	104.475	33.3	17.8	15.1
-571.71	3.6775	15.5	16.9	17.7267	104.475	33	17.7	14.9
-571.7	3.678	15.5	16.9	17.7266	104.475	33.2	17.8	15.1
-571.69	3.678	15.6	16.9	17.7265	104.475	33	17.8	14.9
-571.68	3.6785	15.6	16.9	17.7265	104.474	33.2	17.7	15
-571.67	3.6775	15.6	16.9	17.7264	104.474	32.9	17.8	15.2
-571.66	3.6785	15.5	16.9	17.7263	104.474	33.2	17.8	15.1
-571.65	3.678	15.6	17	17.7261	104.474	33	17.8	14.9
-571.64	3.6785	15.6	16.9	17.726	104.474	33.1	17.7	15
-571.63	3.6785	15.6	16.8	17.7259	104.474	33	17.7	15
-571.62	3.6785	15.6	16.9	17.7258	104.474	33.2	17.7	15.1
-571.61	3.678	15.6	17	17.7257	104.474	33	17.7	15
-571.6	3.678	15.6	16.9	17.7256	104.474	33.2	17.7	15.1
-571.59	3.678	15.6	16.9	17.7255	104.474	33.1	17.8	14.9
-571.58	3.6785	15.5	16.9	17.7254	104.473	33	17.8	15
-571.57	3.678	15.6	17	17.7253	104.473	33.1	17.8	14.9
-571.56	3.678	15.6	17	17.7252	104.473	33.1	17.8	14.9
-571.55	3.6785	15.6	16.9	17.7251	104.473	33.1	17.8	15.1
-571.54	3.678	15.6	16.9	17.725	104.473	33	17.7	15
-571.53	3.678	15.6	16.9	17.7249	104.473	33.1	17.7	15
-571.52	3.6775	15.6	16.9	17.7248	104.473	33	17.7	15
-571.51	3.6785	15.6	17	17.7247	104.472	33.1	17.7	14.9
-571.5	3.678	15.6	16.9	17.7246	104.472	33	17.7	15
-571.49	3.6785	15.5	16.9	17.7245	104.472	33.1	17.7	14.9
-571.48	3.679	15.5	16.9	17.7244	104.472	33	17.7	15
-571.47	3.678	15.6	16.9	17.7244	104.472	33.1	17.8	15
-571.46	3.678	15.6	16.9	17.7243	104.472	33	17.7	15
-571.45	3.678	15.6	17	17.7242	104.472	33.1	17.8	15.1
-571.44	3.678	15.6	16.9	17.7241	104.471	33	17.7	15
-571.43	3.678	15.6	16.8	17.724	104.471	33.1	17.8	15
-571.42	3.678	15.6	17	17.7239	104.471	33	17.7	14.9
-571.41	3.6785	15.6	17	17.7238	104.471	33	17.8	14.9
-571.4	3.678	15.6	16.9	17.7237	104.471	33.1	17.7	14.9
-571.39	3.678	15.5	16.9	17.7236	104.471	33	17.8	15
-571.38	3.678	15.6	16.9	17.7235	104.471	33.1	17.7	14.9
-571.37	3.678	15.6	16.9	17.7234	104.47	33.1	17.8	15
-571.36	3.6785	15.6	17	17.7233	104.47	33	17.8	15
-571.35	3.678	15.6	16.9	17.7232	104.47	33.2	17.8	14.9
-571.34	3.678	15.6	17	17.7231	104.47	32.9	17.8	15
-571.33	3.678	15.6	17	17.723	104.47	33.3	17.7	15
-571.32	3.678	15.5	17	17.7229	104.47	32.8	17.7	15
-571.31	3.6785	15.6	17	17.7228	104.47	33.4	17.7	14.9
-571.3	3.6775	15.5	17	17.7227	104.47	32.8	17.7	15
-571.29	3.6785	15.6	17	17.7226	104.469	33.4	17.7	15
-571.28	3.678	15.6	17	17.7225	104.469	32.7	17.7	15
-571.27	3.6785	15.6	16.9	17.7224	104.469	33.4	17.8	15
-571.26	3.678	15.6	17	17.7223	104.469	32.7	17.7	15
-571.25	3.6775	15.6	17.1	17.7222	104.469	33.4	17.7	15
-571.24	3.678	15.5	17	17.7221	104.469	32.7	17.7	15
-571.23	3.678	15.6	17	17.722	104.469	33.3	17.7	15
-571.22	3.6775	15.5	17	17.7219	104.469	32.8	17.7	15
-571.21	3.6785	15.5	17	17.7218	104.468	33.3	17.7	15
-571.2	3.6775	15.5	16.9	17.7217	104.468	32.8	17.7	14.9
-571.19	3.6785	15.5	17	17.7216	104.468	33.2	17.7	15.1
-571.18	3.6785	15.6	17	17.7216	104.468	32.9	17.7	14.9
-571.17	3.678	15.5	16.9	17.7215	104.468	33.2	17.7	15
-571.16	3.678	15.6	17	17.7213	104.468	32.9	17.7	15
-571.15	3.6785	15.6	17	17.7212	104.467	33.1	17.8	15.1
-571.14	3.678	15.5	17	17.7211	104.467	33	17.8	14.9
-571.13	3.6775	15.6	17	17.721	104.467	33	17.8	15
-571.12	3.678	15.5	17	17.721	104.467	33.2	17.8	15
-571.11	3.678	15.5	17	17.7209	104.467	32.9	17.8	15
-571.1	3.6785	15.6	17	17.7208	104.467	33.2	17.7	15
-571.09	3.678	15.7	17	17.7207	104.467	32.9	17.7	14.9
-571.08	3.6785	15.5	17	17.7206	104.467	33.3	17.7	14.9
-571.07	3.678	15.5	16.9	17.7205	104.466	32.9	17.7	14.9
-571.06	3.678	15.6	17	17.7204	104.466	33.4	17.7	15
-571.05	3.678	15.6	17	17.7203	104.466	32.8	17.8	15
-571.04	3.678	15.5	17	17.7202	104.466	33.5	17.7	15
-571.03	3.6775	15.6	17	17.7202	104.466	32.8	17.7	14.9
-571.02	3.678	15.5	17	17.7201	104.466	33.4	17.8	15
-571.01	3.678	15.6	17	17.72	104.466	32.9	17.7	15
-571	3.678	15.6	17	17.7199	104.466	33.2	17.7	15
-570.99	3.678	15.6	17	17.7198	104.466	33	17.8	14.9
-570.98	3.678	15.5	17	17.7197	104.465	33.2	17.7	15
-570.97	3.6785	15.6	17	17.7196	104.465	33	17.7	15.1
-570.96	3.678	15.6	17	17.7195	104.465	33.1	17.7	15
-570.95	3.678	15.6	16.9	17.7194	104.465	33.2	17.7	15
-570.94	3.6785	15.6	17	17.7193	104.465	33.1	17.7	14.9
-570.93	3.678	15.6	17	17.7192	104.465	33.3	17.7	15
-570.92	3.678	15.6	17	17.7191	104.465	33	17.7	14.9
-570.91	3.678	15.5	16.9	17.719	104.465	33.3	17.7	15.1
-570.9	3.678	15.5	17	17.7189	104.465	32.9	17.7	14.9
-570.89	3.6785	15.6	17	17.7188	104.465	33.3	17.7	15.1
-570.88	3.678	15.5	17	17.7188	104.465	32.9	17.7	15.1
-570.87	3.678	15.6	16.9	17.7187	104.465	33.3	17.7	15.1
-570.86	3.678	15.6	17	17.7186	104.465	32.8	17.7	15
-570.85	3.678	15.6	17	17.7185	104.465	33.3	17.7	14.9
-570.84	3.678	15.6	17	17.7184	104.465	32.9	17.8	14.9
-570.83	3.6785	15.5	17	17.7183	104.465	33.3	17.8	14.9
-570.82	3.6775	15.6	17	17.7182	104.464	33	17.8	15
-570.81	3.678	15.6	17	17.7181	104.464	33.2	17.8	15
-570.8	3.678	15.6	17	17.718	104.465	33	17.6	14.9
-570.79	3.678	15.6	17	17.718	104.465	33.2	17.8	15
-570.78	3.6785	15.6	16.9	17.7179	104.464	33.1	17.7	14.9
-570.77	3.6785	15.6	17	17.7178	104.464	33.2	17.7	15
-570.76	3.6785	15.6	17	17.7177	104.464	33	17.7	15
-570.75	3.678	15.6	17	17.7176	104.464	33.1	17.7	15.1
-570.74	3.678	15.6	17	17.7175	104.464	33.1	17.7	14.9
-570.73	3.678	15.6	17	17.7174	104.464	33.1	17.8	15
-570.72	3.6775	15.6	17	17.7173	104.464	33.1	17.8	14.9
-570.71	3.6775	15.6	17	17.7172	104.464	33.1	17.7	15
-570.7	3.6785	15.5	17	17.7172	104.464	33.1	17.7	14.9
-570.69	3.6785	15.6	16.9	17.7171	104.464	33	17.8	15
-570.68	3.6785	15.5	16.9	17.717	104.464	33.2	17.7	15
-570.67	3.6785	15.6	16.9	17.7169	104.464	32.9	17.7	15
-570.66	3.678	15.6	16.9	17.7168	104.465	33.2	17.7	15
-570.65	3.678	15.6	16.9	17.7167	104.465	32.9	17.7	14.9
-570.64	3.6785	15.6	17.1	17.7167	104.465	33.2	17.8	15
-570.63	3.678	15.6	16.9	17.7166	104.465	32.9	17.8	14.9
-570.62	3.678	15.6	16.9	17.7165	104.465	33.1	17.7	15
-570.61	3.6785	15.6	17	17.7164	104.465	33	17.8	15
-570.6	3.678	15.6	16.9	17.7163	104.465	33.2	17.7	15
-570.59	3.678	15.6	16.9	17.7162	104.465	33	17.8	15
-570.58	3.678	15.5	16.9	17.7161	104.465	33.1	17.7	15
-570.57	3.678	15.5	16.9	17.716	104.465	33.1	17.7	15
-570.56	3.678	15.6	16.9	17.716	104.465	33	17.7	15
-570.55	3.678	15.5	16.9	17.7159	104.465	33.2	17.7	14.9
-570.54	3.6785	15.6	16.9	17.7158	104.465	33.1	17.7	15.1
-570.53	3.6785	15.5	16.9	17.7157	104.465	33.1	17.7	15
-570.52	3.6785	15.6	16.9	17.7156	104.465	33.1	17.7	14.9
-570.51	3.678	15.5	16.9	17.7155	104.465	33	17.8	15
-570.5	3.678	15.6	16.8	17.7154	104.465	33.2	17.7	15
-570.49	3.6785	15.6	16.9	17.7153	104.465	32.4	17.7	15
-570.48	3.678	15.6	16.9	17.7152	104.465	33.8	17.7	15
-570.47	3.6785	15.6	17	17.7152	104.466	32.1	17.8	15
-570.46	3.6785	15.6	16.9	17.7151	104.466	33.6	17.7	15
-570.45	3.6785	15.5	16.8	17.715	104.466	32.3	17.7	15
-570.44	3.678	15.6	16.9	17.7149	104.466	34	17.8	15
-570.43	3.678	15.5	16.9	17.7148	104.466	32.6	17.7	15.1
-570.42	3.678	15.6	16.9	17.7147	104.466	33.8	17.7	15.1
-570.41	3.678	15.6	16.9	17.7146	104.466	32.4	17.8	15
-570.4	3.678	15.7	17	17.7145	104.466	34.2	17.7	15
-570.39	3.678	15.6	16.8	17.7144	104.466	32.3	17.7	14.9
-570.38	3.6785	15.6	16.9	17.7143	104.466	33.6	17.7	15
-570.37	3.6785	15.5	16.9	17.7142	104.466	33	17.7	14.9
-570.36	3.678	15.6	16.9	17.7141	104.467	32.9	17.7	15
-570.35	3.6785	15.6	16.9	17.714	104.467	33.6	17.8	15
-570.34	3.6775	15.6	16.9	17.7139	104.467	33.2	17.8	15
-570.33	3.678	15.5	16.8	17.7138	104.467	33.5	17.7	14.9
-570.32	3.6785	15.6	16.8	17.7137	104.467	32.6	17.7	14.9
-570.31	3.6785	15.6	16.9	17.7137	104.467	33.1	17.7	15
-570.3	3.678	15.6	16.9	17.7136	104.467	32.9	17.7	15
-570.29	3.678	15.6	16.9	17.7135	104.467	34	17.8	14.9
-570.28	3.678	15.6	16.9	17.7134	104.467	32.3	17.8	14.9
-570.27	3.678	15.6	16.9	17.7133	104.467	34	17.7	15
-570.26	3.678	15.5	16.8	17.7132	104.467	32.3	17.7	14.9
-570.25	3.6775	15.6	16.9	17.7131	104.468	34	17.7	15
-570.24	3.6775	15.6	16.9	17.713	104.468	32.3	17.7	14.9
-570.23	3.678	15.7	16.8	17.7129	104.468	33.6	17.7	15
-570.22	3.6785	15.6	16.9	17.7128	104.468	32.6	17.8	14.9
-570.21	3.6785	15.6	16.9	17.7127	104.468	33.6	17.7	15
-570.2	3.6785	15.5	16.9	17.7126	104.468	32.9	17.7	14.9
-570.19	3.678	15.6	16.8	17.7125	104.468	33.8	17.7	15
-570.18	3.678	15.5	16.9	17.7124	104.468	32.8	17.7	14.9
-570.17	3.678	15.7	16.8	17.7123	104.468	33.3	17.7	15
-570.16	3.678	15.6	16.9	17.7123	104.468	33.1	17.7	14.9
-570.15	3.6785	15.7	16.8	17.7122	104.468	33.2	17.7	15.1
-570.14	3.678	15.6	16.9	17.7121	104.469	33.3	17.7	14.9
-570.13	3.678	15.6	16.9	17.712	104.469	33.5	17.7	15
-570.12	3.678	15.5	16.9	17.7119	104.469	33.3	17.7	14.9
-570.11	3.678	15.6	16.9	17.7118	104.469	33.3	17.8	15
-570.1	3.678	15.5	16.9	17.7117	104.469	33.3	17.7	14.9
-570.09	3.678	15.6	16.9	17.7116	104.469	33.3	17.7	14.9
-570.08	3.6785	15.5	16.9	17.7115	104.469	33.3	17.8	15
-570.07	3.678	15.7	16.8	17.7114	104.469	33.2	17.7	15
-570.06	3.678	15.6	16.9	17.7113	104.469	33.3	17.7	15
-570.05	3.6785	15.7	16.9	17.7112	104.469	33.3	17.7	15
-570.04	3.6785	15.6	16.8	17.7111	104.469	33.2	17.8	14.9
-570.03	3.6775	15.6	16.9	17.711	104.469	33.4	17.7	14.9
-570.02	3.678	15.5	16.9	17.7109	104.469	33.2	17.7	15
-570.01	3.678	15.7	16.9	17.7108	104.469	33.4	17.7	15
-570	3.678	15.6	16.9	17.7107	104.47	33.2	17.7	15
-569.99	3.678	15.6	16.9	17.7106	104.47	33.4	17.7	15
-569.98	3.6785	15.6	16.9	17.7105	104.47	33.2	17.7	14.9
-569.97	3.678	15.6	16.9	17.7104	104.47	33.4	17.7	15
-569.96	3.6785	15.6	16.9	17.7103	104.47	33.3	17.7	15
-569.95	3.678	15.6	16.9	17.7102	104.47	33.3	17.8	15
-569.94	3.678	15.5	16.9	17.7101	104.47	33.2	17.8	15
-569.93	3.678	15.7	16.9	17.71	104.47	33.4	17.8	15
-569.92	3.679	15.6	16.9	17.7099	104.47	33.2	17.7	14.9
-569.91	3.678	15.6	16.8	17.7098	104.47	33.4	17.7	15
-569.9	3.678	15.5	16.9	17.7097	104.47	33.3	17.7	14.9
-569.89	3.6785	15.7	16.9	17.7096	104.47	33.3	17.7	15
-569.88	3.6785	15.6	16.9	17.7095	104.47	33.3	17.8	14.9
-569.87	3.678	15.6	16.9	17.7094	104.47	33.2	17.7	14.9
-569.86	3.678	15.6	16.9	17.7093	104.47	33.4	17.8	15
-569.85	3.678	15.5	16.9	17.7092	104.47	33.2	17.7	14.9
-569.84	3.678	15.6	16.9	17.7091	104.47	33.3	17.7	15
-569.83	3.677	15.6	16.9	17.709	104.47	33.2	17.7	15
-569.82	3.6785	15.6	16.9	17.7089	104.47	33.3	17.7	14.9
-569.81	3.679	15.5	16.9	17.7088	104.47	33.3	17.7	14.9
-569.8	3.6785	15.6	16.9	17.7087	104.47	33.3	17.7	15
-569.79	3.678	15.5	16.9	17.7086	104.47	33.3	17.8	15
-569.78	3.6785	15.6	16.9	17.7085	104.47	33.2	17.7	15
-569.77	3.678	15.5	16.9	17.7084	104.47	33.3	17.7	15
-569.76	3.6785	15.6	16.9	17.7083	104.47	33.3	17.7	14.9
-569.75	3.6775	15.6	16.9	17.7082	104.47	33.4	17.8	14.9
-569.74	3.6785	15.6	16.9	17.7081	104.47	33.2	17.8	15
-569.73	3.678	15.6	16.9	17.708	104.47	33.2	17.7	15
-569.72	3.6785	15.7	16.9	17.708	104.47	33.3	17.7	14.9
-569.71	3.678	15.4	16.9	17.7079	104.47	33.3	17.7	14.9
-569.7	3.678	15.6	16.9	17.7078	104.47	33.3	17.7	15
-569.69	3.6785	15.5	16.9	17.7077	104.47	33.3	17.7	15
-569.68	3.6785	15.6	16.8	17.7076	104.47	33.3	17.7	15
-569.67	3.678	15.6	16.8	17.7075	104.47	33.4	17.8	14.9
-569.66	3.679	15.5	16.9	17.7074	104.47	33.3	17.7	15.1
-569.65	3.678	15.6	16.9	17.7073	104.47	33.2	17.7	15
-569.64	3.6785	15.5	16.9	17.7072	104.47	33.4	17.7	14.9
-569.63	3.678	15.7	16.9	17.7071	104.47	33.1	17.8	14.9
-569.62	3.678	15.6	16.8	17.707	104.47	33.3	17.7	14.9
-569.61	3.6785	15.6	16.9	17.7069	104.47	33.3	17.7	15
-569.6	3.678	15.5	16.9	17.7067	104.47	33.4	17.7	15.1
-569.59	3.6785	15.6	16.8	17.7067	104.47	33.2	17.8	15
-569.58	3.678	15.7	16.9	17.7065	104.47	33.4	17.8	15
-569.57	3.678	15.5	16.9	17.7064	104.47	33.1	17.7	15
-569.56	3.6785	15.5	16.9	17.7063	104.47	33.4	17.7	14.9
-569.55	3.678	15.6	16.8	17.7062	104.47	33.2	17.8	15
-569.54	3.678	15.7	16.8	17.7061	104.47	33.3	17.8	14.9
-569.53	3.678	15.5	16.8	17.706	104.47	33.2	17.7	14.9
-569.52	3.678	15.7	16.9	17.7059	104.47	33.2	17.7	15
-569.51	3.6785	15.4	16.8	17.7058	104.47	33.1	17.7	15
-569.5	3.6785	15.7	16.9	17.7057	104.47	33.3	17.7	14.9
-569.49	3.6785	15.5	16.9	17.7056	104.47	33.2	17.7	15
-569.48	3.678	15.7	16.9	17.7055	104.47	33.3	17.7	14.9
-569.47	3.678	15.4	16.8	17.7054	104.47	33.2	17.7	14.9
-569.46	3.6785	15.6	16.9	17.7053	104.47	33.3	17.8	15
-569.45	3.6785	15.7	16.9	17.7052	104.47	33.2	17.7	15
-569.44	3.6785	15.6	16.9	17.7051	104.47	33.3	17.8	14.9
-569.43	3.6785	15.4	16.9	17.705	104.47	33.3	17.7	15
-569.42	3.678	15.6	16.9	17.7049	104.47	33.3	17.7	15
-569.41	3.6785	15.7	16.8	17.7048	104.469	33.2	17.8	15
-569.4	3.6775	15.6	16.9	17.7047	104.469	33.3	17.7	15
-569.39	3.678	15.6	16.9	17.7046	104.469	33.3	17.7	14.9
-569.38	3.678	15.3	16.9	17.7045	104.469	33.3	17.7	14.9
-569.37	3.678	16	16.9	17.7044	104.469	33.3	17.7	15
-569.36	3.678	15.5	16.9	17.7043	104.469	33.3	17.7	14.9
-569.35	3.6785	15.6	17	17.7042	104.469	33.3	17.7	15
-569.34	3.6785	15.4	16.9	17.7041	104.469	33.3	17.7	14.9
-569.33	3.678	15.8	16.8	17.704	104.469	33.3	17.7	14.9
-569.32	3.678	15.6	16.9	17.7039	104.469	33.3	17.7	15
-569.31	3.678	15.7	16.8	17.7038	104.469	33.3	17.7	14.9
-569.3	3.6785	15.4	16.9	17.7037	104.469	33.3	17.7	14.9
-569.29	3.678	15.9	16.9	17.7036	104.469	33.3	17.7	14.9
-569.28	3.678	15.6	16.9	17.7035	104.469	33.3	17.8	14.9
-569.27	3.6785	15.5	16.9	17.7034	104.469	33.3	17.7	15
-569.26	3.6785	15.5	16.8	17.7033	104.469	33.2	17.8	15.1
-569.25	3.678	15.6	16.9	17.7032	104.469	33.3	17.7	15
-569.24	3.6775	15.6	16.9	17.7031	104.469	33.2	17.7	15
-569.23	3.678	15.5	16.9	17.703	104.469	33.3	17.7	14.9
-569.22	3.678	15.6	16.9	17.7029	104.469	33.3	17.7	14.9
-569.21	3.6785	15.8	16.9	17.7028	104.469	33.3	17.8	14.9
-569.2	3.678	15.7	16.9	17.7026	104.469	33.2	17.7	15
-569.19	3.678	15.5	16.8	17.7025	104.468	33.3	17.7	15
-569.18	3.678	15.7	16.8	17.7024	104.468	33.3	17.7	15
-569.17	3.6785	15.5	16.9	17.7023	104.468	33.3	17.8	15
-569.16	3.678	15.6	16.9	17.7022	104.468	33.3	17.7	15
-569.15	3.678	15.4	16.9	17.7021	104.468	33.3	17.7	15
-569.14	3.6785	15.6	16.9	17.702	104.468	33.3	17.7	15
-569.13	3.6785	15.5	16.9	17.7019	104.468	33.3	17.7	15
-569.12	3.6785	15.6	16.9	17.7018	104.468	33.3	17.7	14.9
-569.11	3.6785	15.5	16.9	17.7017	104.468	33.3	17.7	15
-569.1	3.6785	15.7	16.9	17.7016	104.468	33.2	17.7	15
-569.09	3.6785	15.5	16.9	17.7015	104.468	33.2	17.7	15
-569.08	3.6785	15.6	16.9	17.7014	104.468	33.3	17.7	14.9
-569.07	3.678	15.6	16.9	17.7013	104.468	33.3	17.7	15.1
-569.06	3.678	15.6	16.9	17.7012	104.468	33.3	17.7	15
-569.05	3.678	15.6	16.9	17.7011	104.468	33.2	17.7	15
-569.04	3.6785	15.6	16.8	17.701	104.468	33.2	17.8	14.9
-569.03	3.678	15.6	16.9	17.7009	104.467	33.2	17.7	15
-569.02	3.6785	15.6	16.8	17.7008	104.467	33.4	17.7	14.9
-569.01	3.6775	15.7	16.9	17.7006	104.467	33.2	17.7	15.1
-569	3.6775	15.6	16.8	17.7006	104.467	33.4	17.7	15
-568.99	3.678	15.5	16.9	17.7005	104.467	33.2	17.7	15.1
-568.98	3.678	15.6	16.9	17.7004	104.467	33.4	17.8	15
-568.97	3.678	15.6	16.9	17.7003	104.467	33.2	17.7	14.9
-568.96	3.678	15.6	17	17.7002	104.467	33.5	17.8	14.9
-568.95	3.6785	15.6	16.9	17.7001	104.467	33.1	17.7	15
-568.94	3.678	15.6	16.9	17.7	104.467	33.4	17.7	15
-568.93	3.6785	15.6	16.9	17.6999	104.467	33.1	17.7	15
-568.92	3.6775	15.6	16.9	17.6998	104.467	33.4	17.8	15.1
-568.91	3.678	15.6	16.9	17.6996	104.467	33.2	17.7	15
-568.9	3.678	15.5	16.9	17.6995	104.466	33.3	17.7	15
-568.89	3.6785	15.6	16.9	17.6994	104.466	33.3	17.8	15
-568.88	3.6775	15.5	17	17.6993	104.466	33.3	17.7	15
-568.87	3.6785	15.6	16.9	17.6992	104.466	33.3	17.7	15
-568.86	3.6785	15.6	16.9	17.6991	104.466	33.4	17.8	15
-568.85	3.6785	15.6	16.9	17.699	104.466	33	17.7	15
-568.84	3.678	15.6	16.9	17.6989	104.466	33.2	17.7	15
-568.83	3.678	15.6	16.9	17.6988	104.466	33.4	17.7	14.9
-568.82	3.678	15.6	16.9	17.6987	104.466	33.4	17.7	15
-568.81	3.678	15.6	16.8	17.6986	104.466	33.1	17.7	14.9
-568.8	3.6785	15.6	16.9	17.6986	104.466	33.4	17.8	14.9
-568.79	3.678	15.6	16.8	17.6985	104.465	33.2	17.7	15.1
-568.78	3.6785	15.6	16.9	17.6984	104.465	33.3	17.7	14.9
-568.77	3.678	15.6	16.8	17.6982	104.465	33.5	17.7	15
-568.76	3.678	15.6	16.9	17.6981	104.465	33.1	17.7	15
-568.75	3.678	15.7	16.9	17.698	104.465	33.1	17.7	15
-568.74	3.678	15.6	16.9	17.6979	104.465	33.2	17.8	15
-568.73	3.678	15.5	16.8	17.6978	104.465	33.2	17.7	14.9
-568.72	3.678	15.6	16.9	17.6977	104.465	33.2	17.8	14.9
-568.71	3.678	15.6	16.9	17.6976	104.465	33.3	17.7	15
-568.7	3.678	15.6	16.8	17.6975	104.464	33.3	17.7	15
-568.69	3.678	15.6	16.9	17.6974	104.464	33.1	17.8	14.9
-568.68	3.678	15.6	16.9	17.6973	104.464	33.2	17.8	15
-568.67	3.6785	15.6	16.8	17.6972	104.464	33.4	17.7	15
-568.66	3.678	15.6	16.8	17.6971	104.464	33	17.7	15
-568.65	3.678	15.6	16.9	17.697	104.464	33.2	17.7	14.9
-568.64	3.6785	15.6	16.8	17.6969	104.464	33.2	17.7	15
-568.63	3.6785	15.5	16.9	17.6968	104.463	33.2	17.7	14.9
-568.62	3.6785	15.6	16.9	17.6967	104.463	33.2	17.7	14.9
-568.61	3.678	15.6	16.9	17.6966	104.463	33.2	17.8	15
-568.6	3.678	15.6	16.9	17.6965	104.463	33.2	17.7	14.9
-568.59	3.678	15.6	16.9	17.6964	104.463	33.3	17.7	15
-568.58	3.678	15.6	16.9	17.6963	104.463	33.3	17.7	14.9
-568.57	3.6785	15.6	16.9	17.6962	104.463	33.4	17.7	15
-568.56	3.678	15.6	16.9	17.6961	104.463	33.3	17.8	14.9
-568.55	3.678	15.6	16.9	17.696	104.462	33.3	17.8	14.9
-568.54	3.678	15.6	16.8	17.6959	104.462	33.2	17.7	14.9
-568.53	3.6785	15.6	16.9	17.6958	104.462	33.1	17.8	15
-568.52	3.678	15.6	16.9	17.6957	104.462	33.4	17.7	15
-568.51	3.6775	15.5	16.8	17.6956	104.462	33.1	17.7	14.9
-568.5	3.678	15.6	16.9	17.6955	104.462	33.2	17.7	15
-568.49	3.678	15.6	16.9	17.6954	104.462	33.2	17.7	15
-568.48	3.678	15.6	16.9	17.6953	104.462	33.3	17.7	14.9
-568.47	3.6775	15.5	16.9	17.6952	104.462	33.2	17.7	14.9
-568.46	3.678	15.5	16.9	17.6951	104.461	33.2	17.8	15
-568.45	3.6785	15.6	16.8	17.695	104.461	33.1	17.7	15
-568.44	3.678	15.6	16.9	17.6948	104.461	33.2	17.7	15
-568.43	3.678	15.7	16.8	17.6948	104.461	33.2	17.7	15
-568.42	3.6785	15.6	16.9	17.6947	104.461	33.1	17.7	14.9
-568.41	3.678	15.6	16.9	17.6946	104.461	33.2	17.7	15
-568.4	3.6785	15.6	16.9	17.6945	104.461	33.2	17.8	14.9
-568.39	3.678	15.6	16.8	17.6943	104.46	33.2	17.7	15
-568.38	3.6775	15.6	16.9	17.6942	104.46	33.2	17.7	14.9
-568.37	3.678	15.6	16.9	17.6941	104.46	33.2	17.7	14.9
-568.36	3.6775	15.5	16.9	17.694	104.46	33.2	17.7	15
-568.35	3.6785	15.6	16.9	17.6939	104.46	33.2	17.6	15
-568.34	3.678	15.6	16.9	17.6938	104.46	33.2	17.7	14.9
-568.33	3.678	15.6	16.9	17.6937	104.46	33.2	17.8	15
-568.32	3.6775	15.6	16.9	17.6936	104.46	33.1	17.7	14.9
-568.31	3.678	15.5	16.9	17.6935	104.46	33.3	17.7	14.9
-568.3	3.678	15.5	16.9	17.6934	104.459	33.2	17.7	14.9
-568.29	3.6785	15.6	16.9	17.6933	104.459	33.2	17.8	15
-568.28	3.6785	15.5	16.9	17.6931	104.459	33.1	17.7	15
-568.27	3.6785	15.6	16.9	17.693	104.459	33.1	17.7	15
-568.26	3.678	15.6	16.9	17.6929	104.459	33.2	17.7	14.9
-568.25	3.678	15.6	16.9	17.6928	104.459	33.3	17.8	15
-568.24	3.6775	15.5	16.9	17.6927	104.459	33.2	17.7	14.9
-568.23	3.6785	15.6	16.9	17.6926	104.458	33.2	17.7	14.9
-568.22	3.677	15.6	16.9	17.6925	104.458	33.1	17.7	14.9
-568.21	3.6785	15.6	16.9	17.6924	104.458	33.2	17.7	14.9
-568.2	3.678	15.5	16.9	17.6923	104.458	33.2	17.7	15
-568.19	3.678	15.6	16.9	17.6922	104.458	33.2	17.7	14.9
-568.18	3.678	15.6	16.9	17.6921	104.458	33.1	17.7	14.9
-568.17	3.678	15.6	16.9	17.692	104.458	33.3	17.7	15
-568.16	3.6775	15.6	16.9	17.6918	104.457	33.2	17.7	15
-568.15	3.678	15.6	16.9	17.6917	104.457	33.3	17.7	15
-568.14	3.678	15.6	17	17.6916	104.457	33.1	17.8	14.9
-568.13	3.678	15.6	16.9	17.6915	104.457	33.3	17.7	15
-568.12	3.678	15.6	16.9	17.6914	104.457	33.1	17.8	15
-568.11	3.678	15.6	16.8	17.6913	104.457	33.2	17.8	14.9
-568.1	3.678	15.6	16.9	17.6912	104.457	33.1	17.7	15
-568.09	3.6785	15.6	16.9	17.6911	104.456	33.3	17.7	14.9
-568.08	3.678	15.6	16.9	17.6911	104.456	33.2	17.8	15.1
-568.07	3.678	15.5	16.8	17.6909	104.456	33.2	17.7	15
-568.06	3.6775	15.6	16.9	17.6908	104.456	33.2	17.7	15
-568.05	3.6775	15.6	16.9	17.6907	104.456	33.3	17.7	15
-568.04	3.678	15.6	16.9	17.6906	104.456	33.2	17.7	15
-568.03	3.678	15.5	16.9	17.6905	104.456	33.1	17.7	15
-568.02	3.6785	15.6	16.8	17.6904	104.456	33.1	17.7	14.9
-568.01	3.678	15.6	16.8	17.6903	104.456	33.1	17.7	15
-568	3.678	15.6	17	17.6901	104.455	33.2	17.7	14.9
-567.99	3.678	15.6	16.9	17.69	104.455	33.1	17.7	14.9
-567.98	3.678	15.6	16.9	17.6899	104.455	33.3	17.7	15
-567.97	3.6785	15.6	16.9	17.6898	104.455	33.1	17.7	15
-567.96	3.678	15.6	16.9	17.6897	104.455	33.4	17.7	15
-567.95	3.678	15.6	16.9	17.6896	104.455	33.1	17.7	14.9
-567.94	3.6785	15.6	16.9	17.6895	104.455	33.3	17.7	15
-567.93	3.6775	15.5	16.9	17.6894	104.455	33	17.8	14.9
-567.92	3.678	15.6	16.9	17.6892	104.454	33.3	17.8	14.9
-567.91	3.6785	15.6	16.9	17.6891	104.454	33	17.7	15
-567.9	3.6785	15.6	16.9	17.689	104.454	33.3	17.7	15
-567.89	3.6785	15.6	16.9	17.6889	104.454	33	17.7	15
-567.88	3.678	15.6	16.9	17.6888	104.454	33.4	17.7	15
-567.87	3.6785	15.5	16.9	17.6887	104.454	33	17.8	15
-567.86	3.678	15.6	16.9	17.6886	104.454	33.4	17.7	14.9
-567.85	3.678	15.5	16.9	17.6885	104.454	33	17.7	15
-567.84	3.6785	15.6	16.8	17.6884	104.454	33.2	17.7	15.1
-567.83	3.678	15.6	16.9	17.6883	104.454	33.1	17.7	14.9
-567.82	3.6785	15.6	17	17.6882	104.454	33.2	17.7	14.9
-567.81	3.678	15.5	16.9	17.6881	104.453	33	17.7	15
-567.8	3.678	15.6	16.9	17.688	104.453	33.3	17.8	15
-567.79	3.678	15.6	16.8	17.6879	104.453	33.1	17.7	15
-567.78	3.678	15.6	16.8	17.6878	104.453	33.3	17.7	15
-567.77	3.6775	15.6	16.9	17.6876	104.453	33.1	17.7	14.9
-567.76	3.6785	15.6	16.9	17.6875	104.453	33.3	17.7	14.9
-567.75	3.6785	15.6	16.9	17.6874	104.453	33.1	17.7	14.9
-567.74	3.678	15.6	16.9	17.6873	104.453	33.3	17.8	14.9
-567.73	3.678	15.6	16.9	17.6872	104.453	33.2	17.7	15
-567.72	3.6785	15.6	16.8	17.6871	104.453	33.2	17.7	14.9
-567.71	3.678	15.6	16.9	17.687	104.453	33.2	17.7	15
-567.7	3.678	15.6	16.9	17.6869	104.452	33.3	17.7	14.9
-567.69	3.6785	15.7	16.8	17.6868	104.452	33.1	17.8	15
-567.68	3.678	15.6	16.9	17.6867	104.452	33.1	17.7	15
-567.67	3.678	15.6	16.8	17.6865	104.452	33.2	17.7	15
-567.66	3.678	15.5	16.9	17.6864	104.452	33.1	17.7	15
-567.65	3.678	15.6	16.9	17.6863	104.452	33.2	17.8	15
-567.64	3.6785	15.5	16.9	17.6862	104.452	33.2	17.8	15
-567.63	3.678	15.7	16.8	17.6861	104.452	33.2	17.7	15.1
-567.62	3.6775	15.5	16.9	17.686	104.452	33.1	17.8	14.9
-567.61	3.678	15.6	16.8	17.6859	104.452	33.2	17.7	15
-567.6	3.678	15.5	16.9	17.6857	104.452	33.2	17.8	14.9
-567.59	3.678	15.7	16.9	17.6856	104.452	33.2	17.7	15
-567.58	3.6785	15.5	16.9	17.6855	104.452	33	17.7	15
-567.57	3.678	15.7	16.8	17.6854	104.452	33.2	17.8	14.9
-567.56	3.6785	15.5	16.8	17.6853	104.452	33.1	17.7	15
-567.55	3.678	15.7	16.8	17.6852	104.452	33.3	17.7	14.9
-567.54	3.678	15.6	16.9	17.6851	104.452	33.1	17.7	14.9
-567.53	3.678	15.6	16.8	17.685	104.452	33.3	17.7	15
-567.52	3.6785	15.5	16.9	17.6849	104.452	33.2	17.7	15
-567.51	3.6785	15.6	16.9	17.6848	104.451	33.2	17.7	15
-567.5	3.678	15.6	16.9	17.6847	104.451	33.1	17.7	14.9
-567.49	3.678	15.6	16.8	17.6846	104.451	33.2	17.7	15
-567.48	3.678	15.6	16.9	17.6845	104.451	33.2	17.7	14.9
-567.47	3.6785	15.6	16.9	17.6843	104.451	33.2	17.8	14.9
-567.46	3.678	15.6	16.8	17.6842	104.451	33.2	17.7	14.9
-567.45	3.6785	15.6	16.9	17.6841	104.451	33.2	17.7	14.9
-567.44	3.679	15.5	16.9	17.684	104.451	33.2	17.7	14.9
-567.43	3.678	15.5	16.8	17.6839	104.451	33.2	17.7	15.1
-567.42	3.6785	15.6	16.9	17.6837	104.451	33.2	17.8	14.9
-567.41	3.678	15.6	16.9	17.6836	104.451	33.1	17.8	14.9
-567.4	3.6785	15.5	16.8	17.6835	104.451	33.3	17.8	14.9
-567.39	3.678	15.5	16.8	17.6834	104.451	33.2	17.7	15
-567.38	3.6785	15.5	16.9	17.6832	104.451	33.3	17.7	14.9
-567.37	3.6785	15.6	16.8	17.6831	104.451	33.1	17.7	15
-567.36	3.6785	15.6	16.9	17.683	104.451	33.2	17.7	14.9
-567.35	3.678	15.6	16.9	17.6829	104.451	33.1	17.7	15
-567.34	3.6785	15.6	16.9	17.6828	104.451	33.3	17.7	15
-567.33	3.6775	15.5	16.9	17.6826	104.451	33.1	17.7	14.9
-567.32	3.6775	15.6	16.9	17.6825	104.451	33.3	17.7	14.9
-567.31	3.6785	15.6	16.9	17.6824	104.451	33.1	17.7	14.9
-567.3	3.678	15.6	16.9	17.6823	104.451	33.3	17.7	14.9
-567.29	3.6785	15.6	16.9	17.6822	104.451	33	17.7	15
-567.28	3.678	15.6	16.9	17.682	104.451	33.2	17.7	15
-567.27	3.678	15.6	16.9	17.6819	104.451	33.2	17.7	15
-567.26	3.678	15.6	16.9	17.6818	104.451	33.2	17.8	15
-567.25	3.678	15.6	16.9	17.6817	104.451	33.1	17.7	15
-567.24	3.6785	15.6	16.9	17.6816	104.451	33.1	17.7	15
-567.23	3.678	15.6	16.9	17.6814	104.451	33.2	17.7	15
-567.22	3.678	15.6	16.9	17.6813	104.451	33.1	17.8	15
-567.21	3.678	15.6	16.9	17.6812	104.451	33.2	17.7	14.9
-567.2	3.678	15.6	16.9	17.6811	104.451	33.1	17.8	15
-567.19	3.6775	15.6	16.9	17.6809	104.451	33.2	17.7	15
-567.18	3.6785	15.5	16.9	17.6808	104.451	33.1	17.8	15
-567.17	3.678	15.6	16.9	17.6807	104.451	33.2	17.7	15
-567.16	3.678	15.6	16.9	17.6806	104.451	33.1	17.8	14.9
-567.15	3.678	15.6	16.9	17.6804	104.451	33.2	17.7	14.9
-567.14	3.6785	15.6	16.9	17.6803	104.451	33.2	17.7	14.9
-567.13	3.678	15.6	16.9	17.6802	104.451	33.2	17.7	15
-567.12	3.6785	15.6	16.9	17.6801	104.451	33.2	17.7	14.9
-567.11	3.678	15.6	16.9	17.6799	104.451	33.2	17.7	15
-567.1	3.678	15.6	16.9	17.6798	104.451	33.2	17.8	15
-567.09	3.678	15.6	16.9	17.6796	104.451	33.1	17.7	15
-567.08	3.6775	15.6	16.9	17.6795	104.451	33.3	17.7	15
-567.07	3.678	15.6	16.9	17.6794	104.451	33.1	17.8	15
-567.06	3.678	15.6	16.9	17.6793	104.451	33.3	17.7	14.9
-567.05	3.678	15.6	16.9	17.6791	104.451	33.1	17.7	15
-567.04	3.679	15.6	16.9	17.679	104.451	33.2	17.7	14.9
-567.03	3.6775	15.5	16.9	17.6789	104.451	33.2	17.8	15.1
-567.02	3.678	15.6	16.9	17.6788	104.451	33.2	17.7	15
-567.01	3.678	15.6	16.9	17.6786	104.451	33	17.7	15
-567	3.678	15.6	16.9	17.6785	104.451	33.4	17.7	14.9
-566.99	3.678	15.6	16.9	17.6784	104.451	33.1	17.7	15
-566.98	3.678	15.6	16.9	17.6782	104.451	33.2	17.7	15
-566.97	3.678	15.5	16.9	17.6781	104.451	33.1	17.7	14.9
-566.96	3.6775	15.6	16.9	17.678	104.451	33.2	17.8	15
-566.95	3.6785	15.6	16.8	17.6778	104.451	33.1	17.7	14.9
-566.94	3.678	15.5	16.9	17.6777	104.451	33.2	17.8	15
-566.93	3.6785	15.6	16.9	17.6776	104.451	33.1	17.7	15
-566.92	3.6785	15.6	16.9	17.6774	104.451	33.2	17.7	14.9
-566.91	3.678	15.5	16.9	17.6773	104.451	33.3	17.8	14.9
-566.9	3.678	15.6	16.9	17.6771	104.451	33.1	17.7	15
-566.89	3.6785	15.5	16.9	17.677	104.451	33.2	17.7	14.9
-566.88	3.678	15.6	16.9	17.6769	104.451	33.1	17.8	14.9
-566.87	3.6785	15.6	16.8	17.6767	104.451	33.4	17.7	15
-566.86	3.6785	15.6	16.9	17.6766	104.451	33.1	17.8	15
-566.85	3.6785	15.6	16.8	17.6765	104.451	33.2	17.7	15
-566.84	3.6785	15.6	16.9	17.6763	104.451	33	17.7	15
-566.83	3.6785	15.6	16.9	17.6762	104.451	33.4	17.7	14.9
-566.82	3.678	15.5	16.9	17.6761	104.451	33	17.7	15
-566.81	3.6785	15.6	16.9	17.6759	104.451	33.5	17.7	14.9
-566.8	3.6785	15.6	16.9	17.6758	104.451	33.1	17.6	15
-566.79	3.678	15.6	16.8	17.6756	104.451	33.5	17.7	15.1
-566.78	3.6785	15.6	16.9	17.6755	104.451	33	17.7	15
-566.77	3.678	15.6	16.9	17.6754	104.451	33.4	17.7	15
-566.76	3.678	15.6	16.9	17.6752	104.451	33	17.7	14.9
-566.75	3.678	15.5	16.9	17.6751	104.451	33.4	17.7	14.9
-566.74	3.6775	15.6	17	17.6749	104.451	33.1	17.7	15
-566.73	3.678	15.6	16.9	17.6748	104.451	33.4	17.7	15
-566.72	3.6785	15.6	16.8	17.6747	104.451	33	17.8	15
-566.71	3.678	15.6	16.8	17.6745	104.451	33.4	17.7	14.9
-566.7	3.6785	15.6	16.9	17.6744	104.451	33.1	17.7	15
-566.69	3.678	15.6	16.9	17.6743	104.451	33.1	17.7	15
-566.68	3.6785	15.6	16.8	17.6741	104.451	33.3	17.7	15
-566.67	3.678	15.6	16.9	17.674	104.451	33.3	17.7	15
-566.66	3.678	15.6	16.9	17.6738	104.451	33.3	17.7	15
-566.65	3.679	15.6	16.8	17.6737	104.451	33.1	17.8	15
-566.64	3.678	15.5	16.9	17.6735	104.451	33.4	17.8	14.9
-566.63	3.678	15.6	16.8	17.6734	104.451	33.1	17.7	15
-566.62	3.6785	15.5	16.9	17.6732	104.451	33.4	17.7	14.9
-566.61	3.678	15.7	16.9	17.6731	104.451	33	17.7	15
-566.6	3.678	15.5	16.8	17.673	104.451	33.4	17.8	15
-566.59	3.6785	15.7	16.9	17.6728	104.451	33.1	17.7	15
-566.58	3.6785	15.5	16.9	17.6727	104.451	33.2	17.7	15
-566.57	3.678	15.6	16.9	17.6726	104.451	32.8	17.8	15.1
-566.56	3.6785	15.6	16.9	17.6724	104.451	33.6	17.7	14.9
-566.55	3.678	15.6	16.8	17.6723	104.451	32.9	17.8	14.9
-566.54	3.678	15.6	16.9	17.6721	104.451	33.6	17.7	15
-566.53	3.678	15.6	16.9	17.672	104.451	32.7	17.8	15
-566.52	3.678	15.6	16.9	17.6718	104.451	33.6	17.7	14.9
-566.51	3.678	15.6	16.8	17.6717	104.451	32.8	17.7	15
-566.5	3.6775	15.6	16.9	17.6716	104.451	33.7	17.7	14.9
-566.49	3.6785	15.6	16.9	17.6714	104.451	33.1	17.7	15
-566.48	3.6775	15.7	16.9	17.6713	104.451	33.6	17.7	15
-566.47	3.678	15.6	16.9	17.6711	104.451	32.7	17.7	15
-566.46	3.6785	15.7	16.8	17.671	104.451	33.6	17.7	15
-566.45	3.6785	15.6	16.9	17.6708	104.451	33.3	17.7	15
-566.44	3.678	15.6	16.8	17.6707	104.451	32.9	17.8	15
-566.43	3.6785	15.6	16.8	17.6705	104.451	33.1	17.7	15
-566.42	3.6785	15.6	16.9	17.6704	104.451	33.5	17.7	15
-566.41	3.6775	15.6	16.8	17.6702	104.451	33.5	17.7	15
-566.4	3.6775	15.6	16.9	17.6701	104.451	32.8	17.7	14.9
-566.39	3.678	15.6	16.9	17.67	104.451	33.3	17.7	15
-566.38	3.6785	15.6	16.9	17.6698	104.451	32.9	17.7	14.9
-566.37	3.6785	15.6	16.8	17.6697	104.451	33.9	17.7	15
-566.36	3.678	15.6	16.9	17.6695	104.451	32.5	17.7	15
-566.35	3.6785	15.6	16.8	17.6694	104.451	33.6	17.7	15
-566.34	3.678	15.6	16.9	17.6692	104.451	32.6	17.8	15
-566.33	3.6785	15.5	16.9	17.6691	104.451	33.9	17.8	14.9
-566.32	3.678	15.5	17	17.6689	104.451	32.6	17.8	14.9
-566.31	3.6785	15.6	16.8	17.6688	104.451	33.9	17.7	15
-566.3	3.678	15.5	16.9	17.6686	104.451	32.5	17.7	14.9
-566.29	3.6785	15.6	16.8	17.6685	104.451	33.2	17.7	15
-566.28	3.678	15.5	16.9	17.6683	104.451	33.5	17.7	14.9
-566.27	3.678	15.6	16.9	17.6682	104.451	33.9	17.8	14.9
-566.26	3.678	15.5	16.9	17.668	104.451	32.7	17.7	14.9
-566.25	3.678	15.6	16.9	17.6679	104.451	32.9	17.7	15
-566.24	3.678	15.6	16.9	17.6677	104.451	33.8	17.8	14.9
-566.23	3.678	15.6	17	17.6676	104.451	32.6	17.7	15
-566.22	3.678	15.6	16.9	17.6674	104.451	34	17.7	15
-566.21	3.6785	15.6	16.9	17.6673	104.451	32.7	17.7	15
-566.2	3.6785	15.6	16.8	17.6672	104.451	33.8	17.8	14.9
-566.19	3.6785	15.6	16.9	17.667	104.451	32.5	17.7	14.9
-566.18	3.6775	15.6	16.9	17.6669	104.451	33.8	17.7	14.9
-566.17	3.6785	15.6	16.9	17.6667	104.451	32.5	17.7	15.1
-566.16	3.678	15.5	16.9	17.6666	104.451	34	17.7	14.9
-566.15	3.6785	15.6	16.8	17.6664	104.451	32.6	17.7	14.9
-566.14	3.678	15.5	16.9	17.6663	104.451	33.8	17.7	14.9
-566.13	3.6785	15.6	16.9	17.6661	104.451	33.4	17.7	14.9
-566.12	3.6775	15.6	16.9	17.666	104.452	32.8	17.7	15
-566.11	3.6785	15.6	16.9	17.6658	104.452	32.6	17.7	14.9
-566.1	3.678	15.6	16.9	17.6657	104.452	33.7	17.8	15.1
-566.09	3.6785	15.6	16.9	17.6655	104.452	33.7	17.8	15
-566.08	3.678	15.6	16.9	17.6654	104.452	32.6	17.7	15
-566.07	3.678	15.6	16.9	17.6652	104.452	33.6	17.7	14.9
-566.06	3.6785	15.6	16.9	17.6651	104.452	32.9	17.7	14.9
-566.05	3.6785	15.6	16.9	17.6649	104.452	34.1	17.8	15
-566.04	3.678	15.6	16.9	17.6648	104.452	32.5	17.7	15
-566.03	3.678	15.6	16.9	17.6646	104.452	34.1	17.7	15
-566.02	3.6785	15.5	17	17.6645	104.452	32.7	17.7	15
-566.01	3.678	15.6	16.9	17.6643	104.452	34	17.7	14.9
-566	3.678	15.5	16.8	17.6641	104.453	32.5	17.8	14.9
-565.99	3.678	15.6	16.9	17.664	104.453	34	17.6	14.9
-565.98	3.6785	15.6	16.9	17.6638	104.453	32.6	17.7	14.9
-565.97	3.678	15.6	16.9	17.6636	104.453	32.8	17.7	15
-565.96	3.678	15.6	16.8	17.6635	104.453	33.8	17.7	15
-565.95	3.679	15.6	16.9	17.6633	104.453	33.9	17.7	14.9
-565.94	3.6785	15.6	16.9	17.6632	104.453	32.8	17.7	15
-565.93	3.6785	15.6	16.9	17.663	104.453	32.7	17.7	14.9
-565.92	3.6785	15.6	16.9	17.6629	104.453	33.9	17.7	15
-565.91	3.678	15.6	16.8	17.6627	104.453	32.7	17.7	14.9
-565.9	3.6785	15.6	16.9	17.6626	104.453	33.9	17.7	15
-565.89	3.678	15.5	16.9	17.6624	104.453	32.7	17.6	15
-565.88	3.678	15.5	17	17.6622	104.453	33.6	17.8	15
-565.87	3.6785	15.6	16.9	17.6621	104.453	32.6	17.7	14.9
-565.86	3.678	15.5	16.9	17.6619	104.453	34	17.7	15
-565.85	3.678	15.6	16.9	17.6617	104.453	32.7	17.7	14.9
-565.84	3.6775	15.6	16.9	17.6616	104.454	33.5	17.7	15
-565.83	3.6785	15.6	16.9	17.6614	104.454	33.1	17.7	14.9
-565.82	3.6785	15.6	16.8	17.6613	104.454	33.6	17.7	14.9
-565.81	3.678	15.6	16.9	17.6611	104.454	33	17.7	14.9
-565.8	3.678	15.6	16.9	17.661	104.454	33.4	17.7	15
-565.79	3.6785	15.6	16.9	17.6608	104.454	33	17.7	14.9
-565.78	3.6785	15.6	16.9	17.6607	104.454	33.5	17.8	15
-565.77	3.6785	15.6	16.9	17.6605	104.454	33.2	17.7	14.9
-565.76	3.6785	15.5	16.9	17.6604	104.454	33.4	17.7	14.9
-565.75	3.678	15.6	16.9	17.6602	104.454	33.2	17.8	14.9
-565.74	3.6785	15.5	16.8	17.6601	104.454	33.3	17.7	15
-565.73	3.6785	15.6	16.9	17.6599	104.454	33.1	17.7	15
-565.72	3.6785	15.6	16.9	17.6597	104.454	33.3	17.7	14.9
-565.71	3.678	15.6	16.9	17.6596	104.454	33.1	17.8	15
-565.7	3.678	15.6	16.9	17.6594	104.454	33.4	17.7	15
-565.69	3.678	15.5	16.9	17.6593	104.455	33.2	17.7	14.9
-565.68	3.678	15.5	16.9	17.6591	104.455	33.5	17.7	15
-565.67	3.678	15.6	16.8	17.659	104.455	33.2	17.7	15
-565.66	3.6785	15.6	16.9	17.6588	104.455	33.3	17.7	15
-565.65	3.678	15.6	16.9	17.6587	104.455	33.2	17.7	14.9
-565.64	3.6785	15.6	16.9	17.6585	104.455	33.2	17.7	15
-565.63	3.678	15.5	17	17.6583	104.455	33.3	17.7	15
-565.62	3.678	15.6	16.9	17.6582	104.455	33.4	17.8	15
-565.61	3.6785	15.6	16.8	17.658	104.455	33.2	17.7	14.9
-565.6	3.6785	15.6	16.9	17.6579	104.455	33.2	17.7	14.9
-565.59	3.6775	15.6	16.8	17.6577	104.455	33.2	17.7	14.9
-565.58	3.678	15.6	16.9	17.6576	104.455	33.2	17.7	14.9
-565.57	3.6785	15.6	16.8	17.6574	104.455	33.2	17.7	15
-565.56	3.678	15.6	16.9	17.6573	104.455	33.2	17.7	15
-565.55	3.678	15.6	16.8	17.6571	104.455	33.3	17.7	14.9
-565.54	3.678	15.6	17	17.657	104.455	33.4	17.7	14.9
-565.53	3.678	15.6	16.9	17.6568	104.455	33.2	17.7	15
-565.52	3.678	15.6	16.9	17.6567	104.455	33.3	17.8	15
-565.51	3.678	15.6	16.8	17.6565	104.455	33.3	17.7	15.1
-565.5	3.6785	15.6	16.9	17.6564	104.455	33.1	17.7	15
-565.49	3.678	15.6	16.8	17.6562	104.455	33.3	17.8	14.9
-565.48	3.678	15.6	16.9	17.6561	104.455	33.3	17.7	15
-565.47	3.6785	15.6	16.8	17.6559	104.456	33.4	17.8	15
-565.46	3.6785	15.6	16.8	17.6557	104.456	33.2	17.7	15
-565.45	3.678	15.6	16.9	17.6556	104.456	33.4	17.7	15.1
-565.44	3.678	15.6	16.8	17.6554	104.456	33.2	17.7	14.9
-565.43	3.6785	15.5	16.9	17.6553	104.456	33.3	17.7	15
-565.42	3.678	15.6	16.9	17.6551	104.456	33.2	17.7	15
-565.41	3.678	15.6	16.8	17.655	104.456	33.3	17.7	14.9
-565.4	3.6785	15.5	16.9	17.6548	104.456	33.1	17.7	15
-565.39	3.678	15.6	16.9	17.6547	104.456	33.5	17.7	15
-565.38	3.6785	15.5	16.9	17.6545	104.456	33.1	17.7	14.9
-565.37	3.6785	15.6	16.9	17.6544	104.456	33.6	17.7	14.9
-565.36	3.6785	15.6	16.9	17.6542	104.456	33.1	17.7	15
-565.35	3.678	15.5	16.9	17.654	104.456	33.5	17.8	14.9
-565.34	3.678	15.6	16.9	17.6539	104.456	33.1	17.8	14.9
-565.33	3.678	15.6	16.8	17.6537	104.456	33.5	17.7	15
-565.32	3.678	15.6	16.8	17.6536	104.456	33.1	17.7	15
-565.31	3.6785	15.5	16.8	17.6534	104.456	33.4	17.7	15
-565.3	3.6785	15.5	16.9	17.6533	104.456	33.2	17.7	14.9
-565.29	3.678	15.6	16.9	17.6531	104.456	33.3	17.7	15
-565.28	3.6785	15.6	16.9	17.6529	104.456	33.1	17.7	15
-565.27	3.6785	15.6	16.8	17.6528	104.456	33.4	17.8	15
-565.26	3.6785	15.6	16.8	17.6526	104.456	33.1	17.7	14.9
-565.25	3.679	15.6	16.9	17.6525	104.456	33.2	17.7	14.9
-565.24	3.6785	15.6	16.9	17.6523	104.456	33.2	17.7	15.1
-565.23	3.6785	15.5	16.9	17.6521	104.456	33.4	17.7	14.9
-565.22	3.678	15.5	16.9	17.652	104.456	33.2	17.8	14.9
-565.21	3.6775	15.6	16.8	17.6518	104.456	33.3	17.7	14.9
-565.2	3.678	15.6	16.8	17.6517	104.456	33.2	17.7	15
-565.19	3.6785	15.6	16.8	17.6515	104.456	33.3	17.8	15
-565.18	3.678	15.6	16.9	17.6514	104.456	33.3	17.7	14.9
-565.17	3.678	15.6	16.9	17.6512	104.456	33.3	17.7	14.9
-565.16	3.678	15.6	16.9	17.6511	104.456	33.4	17.7	15
-565.15	3.678	15.6	16.9	17.6509	104.456	33.1	17.8	14.9
-565.14	3.6785	15.6	17	17.6508	104.456	33.5	17.8	15
-565.13	3.678	15.6	16.9	17.6506	104.456	33.1	17.7	14.9
-565.12	3.678	15.5	16.9	17.6505	104.456	33.3	17.7	15
-565.11	3.6785	15.5	16.9	17.6503	104.456	33.1	17.7	15
-565.1	3.678	15.6	16.9	17.6502	104.456	33.4	17.7	15.1
-565.09	3.678	15.6	16.8	17.65	104.456	33.2	17.8	14.9
-565.08	3.6785	15.6	16.9	17.6499	104.456	33.5	17.7	15.1
-565.07	3.678	15.5	16.9	17.6497	104.456	33.1	17.7	15
-565.06	3.6785	15.6	16.8	17.6496	104.456	33.5	17.7	14.9
-565.05	3.6785	15.5	16.8	17.6494	104.457	33.1	17.7	14.9
-565.04	3.6785	15.6	16.9	17.6493	104.457	33.4	17.8	15
-565.03	3.6775	15.6	16.9	17.6491	104.457	33.1	17.7	15
-565.02	3.678	15.6	16.9	17.649	104.457	33.5	17.7	15
-565.01	3.6775	15.5	16.9	17.6488	104.457	33.2	17.7	14.9
-565	3.678	15.6	16.9	17.6487	104.456	33.5	17.8	15.1
-564.99	3.6775	15.6	16.9	17.6485	104.456	33.1	17.8	14.9
-564.98	3.6785	15.6	16.9	17.6483	104.456	33.3	17.7	15
-564.97	3.678	15.6	16.9	17.6482	104.457	33.1	17.8	14.9
-564.96	3.678	15.6	16.8	17.648	104.457	33.4	17.7	14.9
-564.95	3.6775	15.5	16.9	17.6479	104.457	33.2	17.7	14.9
-564.94	3.6785	15.6	16.8	17.6477	104.456	33.4	17.7	15
-564.93	3.678	15.6	16.8	17.6476	104.456	33	17.7	15.1
-564.92	3.6785	15.6	16.9	17.6474	104.456	33.4	17.7	14.8
-564.91	3.6775	15.6	16.9	17.6473	104.457	33.2	17.7	15
-564.9	3.6785	15.6	16.9	17.6471	104.456	33.4	17.7	15
-564.89	3.678	15.6	16.9	17.647	104.456	33.1	17.7	15.1
-564.88	3.6785	15.6	16.9	17.6468	104.456	33.4	17.8	14.9
-564.87	3.678	15.6	16.9	17.6467	104.456	33.2	17.7	15.1
-564.86	3.678	15.6	16.9	17.6465	104.456	33.4	17.7	14.8
-564.85	3.678	15.5	16.8	17.6463	104.456	33.2	17.8	15.1
-564.84	3.678	15.6	16.9	17.6462	104.456	33.4	17.7	14.9
-564.83	3.6785	15.6	16.9	17.646	104.456	33.2	17.7	15
-564.82	3.6785	15.6	16.9	17.6459	104.456	33.3	17.7	15
-564.81	3.6785	15.6	16.9	17.6457	104.456	33.2	17.7	15.1
-564.8	3.678	15.6	16.9	17.6456	104.456	33.2	17.7	14.9
-564.79	3.678	15.6	16.8	17.6454	104.456	33.3	17.7	15
-564.78	3.6785	15.6	17	17.6453	104.456	33.3	17.6	14.9
-564.77	3.678	15.6	16.9	17.6451	104.456	33.4	17.7	14.9
-564.76	3.678	15.6	16.9	17.645	104.456	33.2	17.7	15.1
-564.75	3.6785	15.6	16.9	17.6449	104.456	33.4	17.7	14.9
-564.74	3.6785	15.6	16.9	17.6447	104.456	33.3	17.7	15
-564.73	3.678	15.6	16.9	17.6445	104.456	33.4	17.7	14.9
-564.72	3.678	15.6	16.9	17.6444	104.456	33.1	17.7	15.1
-564.71	3.6785	15.6	16.8	17.6442	104.456	33.6	17.7	15
-564.7	3.6775	15.6	16.9	17.6441	104.456	33.1	17.7	15.1
-564.69	3.678	15.5	16.9	17.644	104.456	33.6	17.8	15
-564.68	3.678	15.6	16.9	17.6438	104.456	33	17.7	15
-564.67	3.678	15.6	16.8	17.6437	104.456	33.5	17.7	15
-564.66	3.678	15.6	16.9	17.6435	104.456	33	17.7	14.9
-564.65	3.678	15.5	16.9	17.6434	104.456	33.6	17.7	14.9
-564.64	3.6775	15.6	16.9	17.6432	104.456	33.1	17.7	15
-564.63	3.6785	15.6	16.9	17.6431	104.456	33.6	17.7	15
-564.62	3.678	15.5	16.9	17.6429	104.456	33	17.7	15
-564.61	3.6785	15.5	16.9	17.6428	104.456	33.6	17.6	14.9
-564.6	3.678	15.6	16.9	17.6426	104.456	33.1	17.7	15
-564.59	3.678	15.6	16.8	17.6425	104.456	33.4	17.7	15
-564.58	3.6785	15.5	16.9	17.6424	104.456	33.1	17.7	14.9
-564.57	3.6785	15.5	16.8	17.6422	104.455	33.4	17.8	14.9
-564.56	3.6785	15.6	16.8	17.6421	104.455	33.2	17.6	14.9
-564.55	3.6775	15.5	16.9	17.6419	104.455	33.3	17.7	15
-564.54	3.6785	15.6	16.8	17.6418	104.455	33.2	17.6	15
-564.53	3.6785	15.6	16.9	17.6417	104.455	33.3	17.7	14.9
-564.52	3.678	15.5	16.9	17.6415	104.455	33.3	17.7	15
-564.51	3.6785	15.6	16.9	17.6414	104.455	33.3	17.7	14.9
-564.5	3.678	15.6	16.9	17.6412	104.455	33.3	17.7	15
-564.49	3.6785	15.5	16.8	17.6411	104.455	33.3	17.8	14.9
-564.48	3.678	15.6	16.8	17.6409	104.455	33.3	17.7	15
-564.47	3.678	15.6	16.8	17.6408	104.455	33.3	17.7	15
-564.46	3.678	15.6	16.9	17.6406	104.455	33.2	17.7	15
-564.45	3.6785	15.6	16.8	17.6405	104.455	33.4	17.7	14.9
-564.44	3.678	15.6	16.9	17.6403	104.455	33.2	17.7	14.9
-564.43	3.6785	15.6	16.9	17.6402	104.455	33.4	17.7	15
-564.42	3.678	15.6	16.9	17.6401	104.455	33	17.7	15
-564.41	3.6785	15.6	16.8	17.6399	104.455	33.5	17.8	15
-564.4	3.678	15.6	16.9	17.6398	104.455	33.1	17.6	15
-564.39	3.678	15.6	16.9	17.6396	104.454	33.5	17.7	15
-564.38	3.6785	15.5	16.9	17.6395	104.454	33.1	17.7	14.9
-564.37	3.678	15.6	16.9	17.6393	104.454	33.4	17.7	15
-564.36	3.678	15.5	16.9	17.6392	104.454	33.2	17.7	15
-564.35	3.678	15.7	16.8	17.639	104.454	33.2	17.7	15.1
-564.34	3.6785	15.6	16.8	17.6389	104.454	33.4	17.6	14.9
-564.33	3.6785	15.7	16.9	17.6387	104.454	33	17.7	14.9
-564.32	3.6775	15.6	16.8	17.6386	104.454	33.7	17.7	14.9
-564.31	3.678	15.6	16.8	17.6385	104.454	32.7	17.8	15
-564.3	3.6785	15.5	16.9	17.6384	104.454	34	17.7	15
-564.29	3.6775	15.6	16.9	17.6382	104.454	32.3	17.7	15.1
-564.28	3.6785	15.6	16.8	17.6381	104.453	34.3	17.8	15
-564.27	3.679	15.6	16.9	17.638	104.453	32.2	17.7	14.9
-564.26	3.678	15.5	16.9	17.6378	104.453	34.4	17.7	14.9
-564.25	3.678	15.6	16.9	17.6377	104.453	32.1	17.7	14.9
-564.24	3.6785	15.6	16.8	17.6375	104.453	34.5	17.7	14.9
-564.23	3.678	15.6	16.9	17.6374	104.453	32.1	17.8	15
-564.22	3.6785	15.6	16.9	17.6373	104.453	34.3	17.7	14.9
-564.21	3.6785	15.7	16.9	17.6371	104.453	32.3	17.7	14.9
-564.2	3.6785	15.5	16.9	17.637	104.453	34.2	17.7	14.9
-564.19	3.6785	15.6	16.8	17.6369	104.452	32.6	17.8	14.9
-564.18	3.678	15.5	16.9	17.6367	104.452	34	17.7	14.9
-564.17	3.678	15.6	16.9	17.6366	104.452	32.9	17.8	15
-564.16	3.678	15.5	16.9	17.6365	104.452	33.6	17.8	14.9
-564.15	3.678	15.6	16.9	17.6363	104.452	33.1	17.7	15
-564.14	3.6785	15.5	16.9	17.6362	104.452	33.4	17.8	14.9
-564.13	3.6785	15.6	16.8	17.636	104.452	33.5	17.7	15
-564.12	3.6785	15.6	16.9	17.6359	104.452	33.1	17.7	15
-564.11	3.678	15.6	16.8	17.6357	104.452	33.6	17.7	15.1
-564.1	3.678	15.5	16.9	17.6356	104.452	32.8	17.7	14.9
-564.09	3.678	15.6	16.9	17.6355	104.451	33.8	17.7	15
-564.08	3.678	15.6	16.9	17.6353	104.451	32.9	17.7	14.9
-564.07	3.6785	15.7	16.8	17.6352	104.451	33.7	17.7	15
-564.06	3.678	15.6	16.9	17.6351	104.451	32.9	17.7	14.9
-564.05	3.678	15.6	16.8	17.6349	104.451	33.7	17.7	14.9
-564.04	3.678	15.6	16.9	17.6348	104.451	32.8	17.7	15
-564.03	3.678	15.6	16.8	17.6347	104.451	33.8	17.7	14.9
-564.02	3.678	15.6	16.9	17.6345	104.451	32.8	17.8	14.9
-564.01	3.6785	15.6	16.9	17.6344	104.451	33.6	17.7	14.9
-564	3.6785	15.6	16.9	17.6343	104.451	33	17.7	15
-563.99	3.678	15.6	16.9	17.6341	104.45	33.6	17.6	15
-563.98	3.678	15.6	16.9	17.634	104.45	33	17.7	14.9
-563.97	3.678	15.6	16.8	17.6339	104.45	33.5	17.7	15
-563.96	3.6785	15.6	16.8	17.6337	104.45	33	17.6	15
-563.95	3.678	15.5	16.8	17.6336	104.45	33.6	17.7	14.9
-563.94	3.6775	15.6	16.9	17.6334	104.45	33.1	17.8	15
-563.93	3.678	15.6	16.9	17.6333	104.45	33.5	17.7	14.9
-563.92	3.678	15.6	16.8	17.6332	104.45	33.1	17.7	15
-563.91	3.678	15.5	16.8	17.6331	104.45	33.4	17.7	14.9
-563.9	3.678	15.6	16.9	17.6329	104.45	33.2	17.8	15
-563.89	3.678	15.6	16.8	17.6328	104.449	33.3	17.6	15
-563.88	3.6775	15.7	16.9	17.6327	104.449	33.2	17.8	15
-563.87	3.6785	15.6	16.8	17.6325	104.449	33.3	17.7	15
-563.86	3.6785	15.6	16.8	17.6324	104.449	33.3	17.8	15
-563.85	3.678	15.5	16.8	17.6323	104.449	33.3	17.7	14.9
-563.84	3.6785	15.6	16.9	17.6322	104.449	33.2	17.7	14.9
-563.83	3.678	15.5	16.8	17.632	104.449	33.4	17.7	14.9
-563.82	3.678	15.7	16.9	17.6319	104.449	33.2	17.7	15
-563.81	3.678	15.5	16.9	17.6318	104.449	33.4	17.7	14.9
-563.8	3.678	15.7	16.9	17.6316	104.449	33.1	17.8	14.9
-563.79	3.678	15.6	16.8	17.6315	104.449	33.3	17.7	14.9
-563.78	3.678	15.6	16.9	17.6314	104.448	33.1	17.7	15
-563.77	3.6785	15.5	16.9	17.6313	104.448	33.5	17.7	14.9
-563.76	3.6775	15.5	16.9	17.6312	104.448	33.1	17.8	15.1
-563.75	3.6775	15.5	16.8	17.631	104.448	33.4	17.6	14.9
-563.74	3.678	15.6	16.9	17.6309	104.448	33.2	17.7	14.9
-563.73	3.6785	15.5	16.8	17.6308	104.448	33.5	17.7	14.9
-563.72	3.6785	15.6	16.8	17.6307	104.448	33.1	17.7	14.9
-563.71	3.6785	15.6	16.8	17.6305	104.448	33.4	17.7	14.9
-563.7	3.6785	15.6	16.9	17.6304	104.448	33	17.8	14.9
-563.69	3.678	15.6	16.9	17.6303	104.448	33.4	17.7	14.9
-563.68	3.6785	15.6	16.9	17.6302	104.448	33	17.8	14.9
-563.67	3.678	15.5	16.8	17.6301	104.448	33.4	17.7	14.9
-563.66	3.6775	15.6	16.9	17.6299	104.448	33.1	17.7	14.9
-563.65	3.678	15.6	16.9	17.6298	104.448	33.5	17.7	15
-563.64	3.6775	15.6	16.9	17.6297	104.448	33.2	17.8	15
-563.63	3.678	15.6	16.9	17.6295	104.448	33.4	17.7	15
-563.62	3.6785	15.6	16.9	17.6294	104.448	33.2	17.8	15
-563.61	3.6785	15.5	16.8	17.6293	104.447	33.2	17.7	15
-563.6	3.678	15.6	16.9	17.6292	104.447	33.5	17.8	14.9
-563.59	3.6785	15.6	16.8	17.6291	104.447	33	17.7	15
-563.58	3.6775	15.6	16.8	17.6289	104.447	33.5	17.7	14.9
-563.57	3.6785	15.6	16.9	17.6288	104.447	33.1	17.7	15
-563.56	3.678	15.6	16.9	17.6287	104.447	33.6	17.8	14.9
-563.55	3.678	15.5	16.8	17.6286	104.447	33	17.7	15
-563.54	3.6775	15.7	17	17.6285	104.447	33.6	17.8	15
-563.53	3.679	15.6	16.9	17.6284	104.447	33.1	17.7	15
-563.52	3.678	15.6	16.9	17.6283	104.447	33.5	17.8	14.9
-563.51	3.678	15.5	16.8	17.6282	104.447	33.1	17.7	15
-563.5	3.678	15.6	17	17.628	104.447	33.4	17.8	15
-563.49	3.678	15.6	16.8	17.6279	104.447	33.1	17.7	14.9
-563.48	3.6785	15.6	16.9	17.6278	104.447	33.4	17.8	15.1
-563.47	3.678	15.6	16.8	17.6277	104.447	33.2	17.7	15
-563.46	3.6785	15.6	16.9	17.6276	104.447	33.3	17.8	15
-563.45	3.6785	15.6	16.9	17.6274	104.447	33.2	17.7	14.9
-563.44	3.678	15.6	16.9	17.6273	104.447	33.3	17.7	14.9
-563.43	3.6785	15.6	16.9	17.6272	104.447	33.2	17.7	14.9
-563.42	3.6785	15.6	16.9	17.6271	104.447	33.5	17.7	14.9
-563.41	3.6785	15.6	16.9	17.627	104.447	33.1	17.7	14.9
-563.4	3.6785	15.5	16.9	17.6269	104.447	33.5	17.8	15
-563.39	3.6775	15.6	16.9	17.6268	104.447	33.2	17.8	14.9
-563.38	3.678	15.6	16.8	17.6267	104.447	33.5	17.8	14.9
-563.37	3.678	15.6	16.9	17.6266	104.447	33.2	17.7	14.9
-563.36	3.678	15.6	16.9	17.6265	104.447	33.4	17.8	14.9
-563.35	3.678	15.6	16.9	17.6264	104.447	33.1	17.7	15
-563.34	3.679	15.6	16.9	17.6262	104.447	33.4	17.8	14.9
-563.33	3.6775	15.6	16.8	17.6261	104.447	33.2	17.7	15
-563.32	3.678	15.6	17	17.626	104.447	33.4	17.8	15
-563.31	3.6785	15.6	16.9	17.6259	104.447	33.2	17.8	14.9
-563.3	3.678	15.6	16.8	17.6258	104.447	33.4	17.8	14.9
-563.29	3.678	15.7	16.8	17.6257	104.447	33.1	17.8	14.9
-563.28	3.6775	15.6	16.8	17.6256	104.447	33.3	17.8	14.9
-563.27	3.678	15.5	16.8	17.6255	104.447	33.3	17.8	14.9
-563.26	3.678	15.6	17	17.6254	104.447	33.4	17.8	15
-563.25	3.6785	15.5	16.9	17.6253	104.447	33.4	17.7	14.9
-563.24	3.678	15.6	16.9	17.6252	104.447	33.4	17.8	15
-563.23	3.678	15.6	16.8	17.6251	104.447	33.3	17.7	15
-563.22	3.678	15.7	16.9	17.625	104.447	33.3	17.8	15
-563.21	3.678	15.6	16.8	17.6249	104.447	33.3	17.7	14.9
-563.2	3.6785	15.6	16.8	17.6248	104.447	33.4	17.9	14.9
-563.19	3.6785	15.5	16.9	17.6247	104.447	33.3	17.8	14.9
-563.18	3.678	15.6	16.8	17.6245	104.447	33.4	17.8	15
-563.17	3.6785	15.6	16.9	17.6244	104.447	33.3	17.7	14.9
-563.16	3.6785	15.6	16.9	17.6243	104.447	33.5	17.8	14.9
-563.15	3.679	15.5	16.9	17.6242	104.448	33.2	17.7	14.9
-563.14	3.6785	15.5	16.9	17.6241	104.448	33.4	17.8	14.9
-563.13	3.678	15.6	16.8	17.624	104.448	33.2	17.8	14.9
-563.12	3.678	15.6	16.8	17.6239	104.448	33.6	17.7	14.9
-563.11	3.6775	15.5	16.8	17.6238	104.448	33.2	17.7	15
-563.1	3.678	15.6	16.8	17.6237	104.448	33.3	17.8	14.9
-563.09	3.6785	15.5	16.8	17.6236	104.448	33.2	17.8	15
-563.08	3.678	15.6	16.8	17.6235	104.448	33.5	17.8	15
-563.07	3.6785	15.5	16.8	17.6234	104.448	33.2	17.8	15.1
-563.06	3.678	15.7	16.9	17.6233	104.448	33.5	17.8	14.9
-563.05	3.6785	15.5	16.9	17.6232	104.448	33.2	17.7	15
-563.04	3.678	15.7	16.9	17.6231	104.448	33.4	17.7	15
-563.03	3.678	15.6	16.9	17.623	104.448	33.4	17.8	15
-563.02	3.6785	15.6	16.9	17.6229	104.448	33.1	17.8	15.1
-563.01	3.678	15.6	16.9	17.6228	104.448	33.5	17.7	15.1
-563	3.678	15.6	16.9	17.6227	104.448	33	17.8	15.1
-562.99	3.678	15.6	16.9	17.6226	104.448	33.5	17.7	15.1
-562.98	3.6785	15.6	16.8	17.6224	104.448	33.3	17.7	15.1
-562.97	3.6785	15.5	16.9	17.6223	104.448	33.7	17.7	15.1
-562.96	3.678	15.6	16.9	17.6222	104.448	32.9	17.8	15.1
-562.95	3.678	15.6	16.9	17.6221	104.449	33.7	17.7	15
-562.94	3.6775	15.5	16.8	17.6221	104.449	32.9	17.7	15.1
-562.93	3.679	15.6	16.9	17.622	104.449	33.6	17.7	15.1
-562.92	3.678	15.6	16.8	17.6219	104.449	33.3	17.8	15.1
-562.91	3.678	15.5	16.9	17.6218	104.449	33.6	17.8	15
-562.9	3.6775	15.6	16.9	17.6217	104.449	33	17.7	15.1
-562.89	3.6775	15.7	16.9	17.6216	104.449	33.6	17.7	14.9
-562.88	3.678	15.5	16.9	17.6215	104.449	33.2	17.7	15
-562.87	3.6785	15.7	16.9	17.6214	104.449	33.3	17.7	14.9
-562.86	3.678	15.5	16.8	17.6213	104.449	33.5	17.8	15
-562.85	3.6775	15.6	16.8	17.6212	104.449	33	17.7	14.9
-562.84	3.678	15.4	16.9	17.6211	104.449	33.6	17.7	14.9
-562.83	3.6785	15.7	16.8	17.621	104.449	33.2	17.7	15
-562.82	3.678	15.5	16.9	17.6209	104.449	33.3	17.8	15
-562.81	3.678	15.7	16.9	17.6208	104.449	33.2	17.7	15
-562.8	3.678	15.4	16.9	17.6207	104.449	33.7	17.8	14.9
-562.79	3.6785	15.5	16.8	17.6206	104.45	33.2	17.8	14.9
-562.78	3.6785	15.7	16.9	17.6205	104.45	33.6	17.7	15
-562.77	3.678	15.7	16.9	17.6204	104.45	33.2	17.7	14.9
-562.76	3.678	15.5	16.9	17.6203	104.45	33.5	17.8	14.9
-562.75	3.678	15.5	16.8	17.6202	104.45	33.2	17.7	15
-562.74	3.678	15.6	16.9	17.6202	104.45	33.4	17.7	14.9
-562.73	3.679	15.5	16.8	17.6201	104.45	33.1	17.7	14.9
-562.72	3.6785	15.7	16.8	17.62	104.45	33.5	17.7	14.9
-562.71	3.678	15.5	16.8	17.6199	104.45	33.1	17.7	14.9
-562.7	3.678	15.6	16.9	17.6198	104.45	33.3	17.8	15
-562.69	3.678	15.5	16.8	17.6197	104.45	33.3	17.7	14.9
-562.68	3.678	15.6	16.8	17.6196	104.45	33.3	17.7	14.9
-562.67	3.678	15.5	16.9	17.6196	104.45	33.3	17.7	14.9
-562.66	3.678	15.5	16.9	17.6195	104.45	33.4	17.7	15
-562.65	3.678	15.5	16.9	17.6194	104.45	33.4	17.7	14.9
-562.64	3.678	15.7	16.9	17.6193	104.45	33.4	17.7	14.9
-562.63	3.678	15.6	16.8	17.6192	104.45	33.4	17.7	15
-562.62	3.6775	15.6	16.9	17.6191	104.45	33.3	17.8	15
-562.61	3.678	15.6	16.8	17.619	104.45	33.4	17.7	14.9
-562.6	3.6785	15.6	16.8	17.619	104.45	33.3	17.7	14.9
-562.59	3.6785	15.6	16.8	17.6189	104.451	33.4	17.7	15
-562.58	3.6775	15.6	16.9	17.6188	104.451	33.4	17.8	14.9
-562.57	3.678	15.6	16.8	17.6187	104.451	33.4	17.7	15.1
-562.56	3.6775	15.6	16.9	17.6186	104.451	33.3	17.8	14.8
-562.55	3.678	15.6	16.9	17.6186	104.451	33.3	17.7	15
-562.54	3.679	15.6	16.9	17.6185	104.451	33.4	17.7	15
-562.53	3.678	15.6	16.8	17.6184	104.451	33.4	17.8	15
-562.52	3.678	15.6	16.9	17.6183	104.451	33.6	17.7	14.9
-562.51	3.6785	15.6	16.9	17.6183	104.451	33.3	17.7	14.9
-562.5	3.678	15.6	16.9	17.6182	104.451	33.4	17.7	14.9
-562.49	3.678	15.6	16.8	17.6181	104.451	33.2	17.7	14.9
-562.48	3.6785	15.6	16.9	17.6181	104.451	33.5	17.7	15
-562.47	3.678	15.6	16.9	17.618	104.451	33.4	17.7	14.9
-562.46	3.678	15.6	16.9	17.6179	104.451	33.5	17.8	15.1
-562.45	3.6785	15.6	16.9	17.6178	104.451	33.3	17.7	14.9
-562.44	3.6785	15.6	16.8	17.6178	104.451	33.4	17.7	15
-562.43	3.678	15.6	16.8	17.6177	104.451	33.3	17.7	14.9
-562.42	3.678	15.6	16.8	17.6176	104.451	33.6	17.8	15
-562.41	3.6785	15.6	16.8	17.6175	104.451	33.3	17.6	15
-562.4	3.678	15.5	16.9	17.6175	104.451	33.5	17.8	14.9
-562.39	3.679	15.6	16.8	17.6174	104.451	33.3	17.7	15
-562.38	3.678	15.6	16.9	17.6173	104.451	33.5	17.8	15
-562.37	3.6775	15.6	16.8	17.6172	104.451	33.3	17.7	15.1
-562.36	3.6785	15.6	16.9	17.6172	104.451	33.3	17.8	15
-562.35	3.678	15.6	16.9	17.6171	104.451	33.3	17.8	15
-562.34	3.678	15.5	16.8	17.6171	104.451	33.4	17.7	15
-562.33	3.678	15.6	16.9	17.617	104.451	33.4	17.7	15
-562.32	3.6785	15.6	16.9	17.6169	104.451	33.5	17.7	15
-562.31	3.6785	15.6	16.8	17.6169	104.451	33.3	17.7	15.1
-562.3	3.6785	15.6	16.9	17.6168	104.451	33.2	17.7	15
-562.29	3.6775	15.6	16.9	17.6167	104.451	33.5	17.7	14.9
-562.28	3.6785	15.5	16.8	17.6166	104.451	33.2	17.7	14.9
-562.27	3.678	15.6	16.8	17.6165	104.451	33.3	17.7	14.9
-562.26	3.678	15.6	16.9	17.6164	104.451	33.4	17.7	15
-562.25	3.6775	15.6	16.8	17.6164	104.451	33.4	17.7	14.9
-562.24	3.678	15.6	16.8	17.6163	104.451	33.3	17.8	15
-562.23	3.678	15.6	16.9	17.6163	104.451	33.4	17.7	14.9
-562.22	3.678	15.6	16.8	17.6162	104.451	33.2	17.8	15
-562.21	3.6785	15.6	16.8	17.6161	104.451	33.4	17.7	15
-562.2	3.6785	15.6	16.9	17.6161	104.451	33.3	17.7	15.1
-562.19	3.678	15.6	16.8	17.616	104.451	33.3	17.7	14.9
-562.18	3.678	15.6	17	17.6159	104.451	33.4	17.7	15.1
-562.17	3.6785	15.6	16.8	17.6159	104.451	33.3	17.7	15
-562.16	3.6785	15.5	17	17.6158	104.451	33.3	17.8	15.1
-562.15	3.6785	15.5	16.8	17.6157	104.451	33.2	17.7	14.9
-562.14	3.6785	15.5	16.9	17.6157	104.451	33.3	17.7	15
-562.13	3.678	15.6	16.9	17.6156	104.45	33.3	17.7	15
-562.12	3.678	15.6	16.9	17.6156	104.45	33.4	17.7	15
-562.11	3.678	15.6	16.8	17.6155	104.45	33.3	17.7	14.9
-562.1	3.6785	15.6	16.8	17.6155	104.45	33.3	17.7	14.9
-562.09	3.678	15.5	16.8	17.6154	104.45	33.3	17.7	15
-562.08	3.678	15.6	16.9	17.6153	104.45	33.4	17.7	15
-562.07	3.678	15.5	16.9	17.6153	104.45	33.4	17.7	14.9
-562.06	3.678	15.6	16.8	17.6152	104.45	33.3	17.7	15
-562.05	3.6785	15.6	16.8	17.6151	104.45	33.3	17.7	15
-562.04	3.6785	15.6	16.9	17.6151	104.45	33.3	17.7	15
-562.03	3.678	15.6	16.9	17.615	104.45	33.3	17.7	15
-562.02	3.678	15.6	16.8	17.6149	104.45	33.4	17.7	15
-562.01	3.678	15.6	17	17.6149	104.45	33.3	17.7	15
-562	3.6785	15.6	16.9	17.6148	104.45	33.3	17.8	15
-561.99	3.679	15.6	16.9	17.6148	104.45	33.3	17.7	14.9
-561.98	3.678	15.5	16.9	17.6147	104.45	33.4	17.7	15
-561.97	3.6785	15.5	16.9	17.6146	104.45	33.3	17.7	14.9
-561.96	3.6785	15.6	16.9	17.6146	104.45	33.2	17.8	14.9
-561.95	3.6785	15.6	16.8	17.6145	104.45	33.3	17.7	14.9
-561.94	3.6785	15.6	16.9	17.6145	104.449	33.2	17.7	15
-561.93	3.678	15.6	16.8	17.6144	104.449	33.3	17.7	15
-561.92	3.678	15.6	16.9	17.6144	104.449	33.3	17.7	15
-561.91	3.6785	15.5	16.8	17.6143	104.449	33.4	17.7	14.9
-561.9	3.678	15.6	16.9	17.6143	104.449	33.2	17.8	15
-561.89	3.6785	15.6	16.8	17.6142	104.449	33.3	17.7	15
-561.88	3.6785	15.6	16.9	17.6142	104.449	33.4	17.7	15
-561.87	3.678	15.5	16.8	17.6141	104.449	33.3	17.7	14.9
-561.86	3.678	15.6	16.9	17.6141	104.449	33.3	17.7	15
-561.85	3.678	15.6	16.9	17.614	104.449	33.3	17.7	15
-561.84	3.678	15.6	16.8	17.614	104.449	33.4	17.7	15
-561.83	3.6785	15.6	16.8	17.614	104.449	33.3	17.7	15
-561.82	3.6785	15.6	16.9	17.6139	104.449	33.3	17.7	14.9
-561.81	3.6785	15.5	16.8	17.6139	104.449	33.3	17.7	14.9
-561.8	3.678	15.6	16.9	17.6138	104.448	33.6	17.7	15
-561.79	3.6785	15.6	16.9	17.6137	104.448	33.3	17.7	15
-561.78	3.678	15.6	16.9	17.6137	104.448	33.4	17.7	15
-561.77	3.6785	15.6	16.9	17.6137	104.448	33.3	17.7	14.9
-561.76	3.678	15.6	16.9	17.6136	104.448	33.4	17.8	15
-561.75	3.678	15.6	16.9	17.6135	104.448	33.4	17.8	15.1
-561.74	3.678	15.6	16.9	17.6135	104.448	33.4	17.7	15
-561.73	3.678	15.5	16.9	17.6134	104.448	33.2	17.7	15
-561.72	3.678	15.6	16.9	17.6134	104.448	33.3	17.7	15
-561.71	3.678	15.6	16.8	17.6133	104.448	33.4	17.7	15
-561.7	3.678	15.6	16.9	17.6133	104.448	33.3	17.7	15
-561.69	3.678	15.6	16.8	17.6133	104.448	33.3	17.6	15
-561.68	3.678	15.6	16.9	17.6132	104.447	33.4	17.8	15
-561.67	3.6775	15.6	16.8	17.6132	104.447	33.4	17.7	15
-561.66	3.678	15.6	16.9	17.6131	104.447	33.1	17.7	15.1
-561.65	3.6785	15.6	16.8	17.6131	104.447	33.3	17.8	14.9
-561.64	3.6785	15.6	16.9	17.613	104.447	33.2	17.7	15
-561.63	3.678	15.5	16.8	17.613	104.447	33.5	17.7	14.9
-561.62	3.678	15.6	16.9	17.613	104.447	33.2	17.7	15
-561.61	3.678	15.6	16.8	17.6129	104.447	33.5	17.7	15
-561.6	3.678	15.6	16.9	17.6129	104.446	33.2	17.7	15.1
-561.59	3.678	15.6	16.8	17.6129	104.446	33.3	17.7	15
-561.58	3.6785	15.6	16.9	17.6129	104.446	33.2	17.8	15.1
-561.57	3.678	15.6	16.8	17.6128	104.446	33.4	17.7	14.9
-561.56	3.678	15.6	16.8	17.6128	104.446	33.4	17.8	15
-561.55	3.678	15.5	16.8	17.6127	104.446	33.4	17.7	14.9
-561.54	3.6785	15.6	16.9	17.6127	104.446	33.4	17.6	15.1
-561.53	3.6785	15.6	16.8	17.6127	104.446	33.3	17.8	14.9
-561.52	3.678	15.6	16.9	17.6127	104.445	33.4	17.7	15
-561.51	3.6785	15.6	16.9	17.6127	104.445	33.3	17.7	15
-561.5	3.678	15.5	16.8	17.6126	104.445	33.4	17.7	15
-561.49	3.678	15.6	16.9	17.6126	104.445	33.3	17.7	15
-561.48	3.678	15.6	16.9	17.6126	104.445	33.4	17.8	15
-561.47	3.6785	15.6	16.9	17.6125	104.445	33.3	17.7	15
-561.46	3.6775	15.6	16.9	17.6125	104.445	33.3	17.7	14.9
-561.45	3.6775	15.5	16.9	17.6125	104.444	33.4	17.7	15
-561.44	3.678	15.6	16.9	17.6125	104.444	33.3	17.7	15
-561.43	3.678	15.6	16.9	17.6124	104.444	33.4	17.7	15
-561.42	3.678	15.6	16.9	17.6124	104.444	33.3	17.7	15
-561.41	3.6775	15.6	16.8	17.6124	104.444	33.4	17.7	15
-561.4	3.6785	15.6	16.9	17.6124	104.444	33.3	17.7	15
-561.39	3.678	15.6	16.9	17.6124	104.444	33.3	17.7	15
-561.38	3.678	15.5	16.9	17.6124	104.443	33.2	17.7	15
-561.37	3.678	15.6	16.9	17.6123	104.443	33.4	17.7	15
-561.36	3.678	15.6	16.8	17.6123	104.443	33.3	17.8	15.1
-561.35	3.678	15.7	16.9	17.6123	104.443	33.5	17.8	15
-561.34	3.6785	15.6	16.9	17.6123	104.443	33.2	17.7	15.1
-561.33	3.678	15.6	16.9	17.6123	104.443	33.5	17.7	14.9
-561.32	3.678	15.6	16.9	17.6123	104.443	33.3	17.7	15
-561.31	3.6785	15.5	16.8	17.6122	104.442	33.4	17.7	15.1
-561.3	3.679	15.6	16.8	17.6122	104.442	33.4	17.7	15
-561.29	3.678	15.5	16.9	17.6122	104.442	33.4	17.8	15
-561.28	3.6785	15.6	16.9	17.6122	104.442	33.3	17.7	15
-561.27	3.678	15.5	16.8	17.6122	104.442	33.4	17.9	15
-561.26	3.678	15.6	16.9	17.6122	104.442	33.4	17.7	15.1
-561.25	3.6785	15.5	16.9	17.6121	104.442	33.4	17.7	15
-561.24	3.678	15.6	16.9	17.6121	104.442	33.5	17.8	15
-561.23	3.6785	15.6	16.9	17.6121	104.441	33.3	17.7	15
-561.22	3.6785	15.6	16.9	17.6121	104.441	33.5	17.8	15
-561.21	3.6785	15.6	16.8	17.6121	104.441	33.3	17.7	15
-561.2	3.6785	15.6	16.9	17.6121	104.441	33.5	17.8	15
-561.19	3.678	15.6	16.8	17.6121	104.441	33.3	17.7	15.1
-561.18	3.678	15.6	16.9	17.6121	104.441	33.5	17.7	15
-561.17	3.678	15.6	16.8	17.6121	104.441	33.2	17.7	15
-561.16	3.678	15.6	16.9	17.6121	104.44	33.5	17.7	15.1
-561.15	3.678	15.6	16.8	17.6121	104.44	33.2	17.7	15.1
-561.14	3.6775	15.5	16.9	17.6121	104.44	33.6	17.7	15.1
-561.13	3.678	15.6	16.8	17.6121	104.44	33.2	17.7	15
-561.12	3.6785	15.6	16.9	17.6121	104.44	33.6	17.7	15.1
-561.11	3.6785	15.6	16.8	17.6121	104.44	33.1	17.7	15
-561.1	3.678	15.6	16.8	17.6121	104.44	33.6	17.8	15.1
-561.09	3.678	15.6	16.9	17.6121	104.44	33.1	17.7	15
-561.08	3.678	15.6	16.8	17.6121	104.44	33.7	17.7	15.1
-561.07	3.6785	15.6	16.9	17.6121	104.44	33.1	17.7	15
-561.06	3.6785	15.6	16.9	17.6121	104.44	33.7	17.7	15.1
-561.05	3.6775	15.6	16.9	17.6121	104.439	33	17.7	15
-561.04	3.678	15.6	16.8	17.6121	104.439	33.7	17.7	15.1
-561.03	3.678	15.6	16.8	17.6121	104.439	33.1	17.7	15.1
-561.02	3.6785	15.6	16.8	17.6121	104.439	33.6	17.7	15.1
-561.01	3.6785	15.6	16.8	17.6121	104.439	33	17.7	15.1
-561	3.678	15.6	16.9	17.6121	104.439	33.7	17.7	15
-560.99	3.6785	15.5	16.8	17.6121	104.439	33.1	17.7	15.1
-560.98	3.6775	15.6	16.9	17.6122	104.439	33.7	17.8	15.1
-560.97	3.678	15.6	16.8	17.6121	104.439	33.1	17.8	15
-560.96	3.6775	15.6	16.9	17.6121	104.439	33.6	17.7	15
-560.95	3.678	15.6	16.8	17.6121	104.439	33	17.7	15.1
-560.94	3.678	15.6	16.8	17.6122	104.438	33.6	17.7	15.1
-560.93	3.6785	15.5	16.9	17.6122	104.438	33.1	17.7	15
-560.92	3.6785	15.6	16.9	17.6122	104.438	33.5	17.8	15
-560.91	3.678	15.5	16.8	17.6122	104.438	33.2	17.7	15
-560.9	3.6785	15.6	16.9	17.6122	104.438	33.4	17.7	15.1
-560.89	3.678	15.6	16.8	17.6122	104.438	33.2	17.7	15
-560.88	3.678	15.6	16.9	17.6123	104.438	33.6	17.7	15.1
-560.87	3.678	15.5	16.8	17.6123	104.438	33.4	17.7	15.1
-560.86	3.6785	15.6	16.9	17.6123	104.438	33.3	17.8	15.1
-560.85	3.678	15.6	16.8	17.6123	104.438	33.4	17.7	15
-560.84	3.6775	15.6	16.8	17.6123	104.438	33.4	17.8	15
-560.83	3.678	15.6	16.8	17.6123	104.437	33.5	17.7	15
-560.82	3.678	15.6	16.9	17.6124	104.437	33.2	17.8	15.1
-560.81	3.6785	15.7	16.9	17.6124	104.437	33.5	17.7	14.9
-560.8	3.678	15.6	16.8	17.6124	104.437	33.1	17.7	15.1
-560.79	3.678	15.6	16.8	17.6124	104.437	33.6	17.7	15
-560.78	3.6785	15.6	16.9	17.6125	104.437	33.2	17.7	15
-560.77	3.678	15.6	16.8	17.6125	104.437	33.6	17.7	14.9
-560.76	3.6785	15.6	16.9	17.6125	104.437	33	17.7	15.1
-560.75	3.678	15.6	16.8	17.6125	104.437	33.6	17.7	15
-560.74	3.6785	15.6	16.9	17.6125	104.437	33.1	17.8	15.1
-560.73	3.6785	15.5	16.8	17.6125	104.437	33.7	17.7	14.9
-560.72	3.678	15.6	16.8	17.6125	104.437	32.9	17.7	14.9
-560.71	3.679	15.5	16.9	17.6126	104.437	34	17.7	15
-560.7	3.6785	15.6	16.9	17.6126	104.437	32.8	17.8	14.9
-560.69	3.678	15.6	16.8	17.6126	104.437	33.8	17.7	15.1
-560.68	3.678	15.6	16.9	17.6127	104.437	33.1	17.7	14.9
-560.67	3.6785	15.6	16.9	17.6127	104.436	34	17.8	15
-560.66	3.6785	15.5	16.9	17.6127	104.436	32.8	17.8	15
-560.65	3.678	15.7	16.9	17.6127	104.436	34	17.7	15.1
-560.64	3.6785	15.5	16.9	17.6128	104.436	32.8	17.8	15
-560.63	3.6785	15.7	16.9	17.6128	104.436	34.1	17.7	15
-560.62	3.6785	15.5	16.8	17.6129	104.436	32.8	17.7	14.9
-560.61	3.678	15.7	16.9	17.6129	104.436	33.5	17.7	14.9
-560.6	3.678	15.6	16.8	17.6129	104.436	33.5	17.7	14.9
-560.59	3.678	15.5	16.9	17.613	104.436	33.9	17.7	14.9
-560.58	3.6785	15.5	16.9	17.613	104.436	32.8	17.7	15
-560.57	3.678	15.5	16.9	17.613	104.436	33.2	17.7	15
-560.56	3.678	15.6	16.8	17.6131	104.436	33.7	17.7	15
-560.55	3.678	15.5	16.9	17.6131	104.436	33.3	17.7	15
-560.54	3.678	15.7	16.9	17.6132	104.435	33.6	17.7	15
-560.53	3.678	15.5	16.8	17.6132	104.435	32.6	17.7	15
-560.52	3.678	15.6	16.9	17.6133	104.435	34.1	17.8	15
-560.51	3.6775	15.5	16.9	17.6133	104.435	33.1	17.7	14.9
-560.5	3.678	15.7	16.9	17.6133	104.435	33.3	17.7	15
-560.49	3.6785	15.6	16.8	17.6134	104.435	32.7	17.8	15
-560.48	3.678	15.6	16.8	17.6134	104.435	34	17.7	15
-560.47	3.6785	15.6	16.9	17.6135	104.435	32.7	17.7	14.9
-560.46	3.6785	15.6	16.9	17.6135	104.435	34.2	17.7	15
-560.45	3.6785	15.6	16.9	17.6135	104.435	33.4	17.7	14.9
-560.44	3.678	15.6	16.8	17.6136	104.435	33.3	17.7	15
-560.43	3.678	15.6	16.8	17.6136	104.435	33.6	17.7	15
-560.42	3.678	15.6	16.9	17.6137	104.435	33.4	17.7	15
-560.41	3.678	15.6	16.8	17.6138	104.435	33	17.7	14.9
-560.4	3.6785	15.7	16.9	17.6138	104.435	34	17.7	15
-560.39	3.678	15.6	16.8	17.6138	104.434	33.8	17.7	15
-560.38	3.678	15.6	16.8	17.6139	104.434	32.9	17.7	15
-560.37	3.678	15.7	16.8	17.6139	104.434	33.7	17.7	15
-560.36	3.678	15.6	16.9	17.614	104.434	33.2	17.8	15
-560.35	3.678	15.6	16.8	17.614	104.434	33.8	17.7	14.9
-560.34	3.678	15.6	16.9	17.6141	104.434	33.1	17.7	14.9
-560.33	3.678	15.6	16.9	17.6141	104.434	32.6	17.7	15
-560.32	3.678	15.7	16.8	17.6142	104.434	34.5	17.7	14.9
-560.31	3.6785	15.6	16.8	17.6142	104.434	32.8	17.7	14.9
-560.3	3.6785	15.6	16.8	17.6143	104.434	34.3	17.7	14.9
-560.29	3.6775	15.6	16.8	17.6143	104.434	33	17.7	14.9
-560.28	3.6785	15.6	16.8	17.6144	104.434	33	17.8	14.9
-560.27	3.6785	15.6	16.9	17.6145	104.434	32.3	17.8	14.9
-560.26	3.678	15.7	16.8	17.6145	104.434	34.5	17.8	14.9
-560.25	3.6785	15.6	16.8	17.6146	104.433	32.8	17.7	14.9
-560.24	3.678	15.6	16.8	17.6147	104.433	33.3	17.7	15
-560.23	3.678	15.6	16.9	17.6147	104.433	34.5	17.7	14.9
-560.22	3.678	15.6	16.8	17.6148	104.433	31.9	17.8	14.9
-560.21	3.678	15.6	16.8	17.6149	104.433	35.8	17.7	15
-560.2	3.6785	15.7	16.8	17.6149	104.433	30.8	17.8	14.9
-560.19	3.6785	15.6	16.9	17.615	104.433	33	17.7	14.9
-560.18	3.678	15.6	16.9	17.6151	104.433	34.5	17.8	15
-560.17	3.678	15.6	16.9	17.6151	104.433	36.2	17.7	14.9
-560.16	3.679	15.6	16.8	17.6152	104.432	30.6	17.7	15
-560.15	3.6785	15.6	16.9	17.6153	104.432	35.8	17.7	14.9
-560.14	3.678	15.6	16.8	17.6153	104.432	30.6	17.7	14.9
-560.13	3.6785	15.6	16.9	17.6154	104.432	34.4	17.7	14.9
-560.12	3.679	15.6	16.9	17.6155	104.432	33.6	17.7	14.9
-560.11	3.678	15.7	16.8	17.6155	104.432	35	17.7	14.9
-560.1	3.6775	15.6	16.9	17.6156	104.432	32.5	17.8	15
-560.09	3.678	15.7	16.8	17.6157	104.432	32	17.7	15
-560.08	3.678	15.6	16.9	17.6158	104.432	34.9	17.7	15
-560.07	3.6785	15.6	16.9	17.6158	104.432	34.5	17.7	14.9
-560.06	3.678	15.6	16.9	17.6159	104.432	31.1	17.8	14.9
-560.05	3.678	15.6	16.9	17.6159	104.432	32	17.8	14.9
-560.04	3.678	15.6	16.8	17.616	104.431	34.8	17.8	15
-560.03	3.6775	15.6	16.8	17.6161	104.431	32.3	17.8	15
-560.02	3.6785	15.6	16.9	17.6162	104.431	34.9	17.8	14.9
-560.01	3.678	15.6	16.8	17.6163	104.431	32.9	17.7	14.9
-560	3.6785	15.6	16.9	17.6163	104.431	33.7	17.7	14.9
-559.99	3.6775	15.6	16.8	17.6164	104.431	31.9	17.7	14.9
-559.98	3.6785	15.6	16.8	17.6165	104.431	34.7	17.7	14.9
-559.97	3.6785	15.7	16.8	17.6165	104.431	33.1	17.7	14.9
-559.96	3.6785	15.7	16.9	17.6166	104.431	33.5	17.8	15
-559.95	3.678	15.6	16.9	17.6167	104.431	33.2	17.7	15
-559.94	3.6785	15.6	16.9	17.6168	104.431	33.5	17.7	15
-559.93	3.678	15.7	16.8	17.6168	104.431	33.2	17.7	15
-559.92	3.6775	15.6	16.8	17.6169	104.43	33.5	17.7	15
-559.91	3.678	15.6	16.9	17.617	104.43	33.3	17.7	14.9
-559.9	3.6775	15.7	16.9	17.6171	104.43	33.4	17.7	14.9
-559.89	3.678	15.6	16.8	17.6172	104.43	33.3	17.7	14.9
-559.88	3.678	15.6	16.9	17.6172	104.43	33.5	17.8	15
-559.87	3.678	15.6	16.9	17.6173	104.43	33.2	17.8	14.9
-559.86	3.6785	15.6	16.9	17.6174	104.43	33.6	17.6	14.9
-559.85	3.678	15.6	16.8	17.6175	104.43	33.3	17.8	14.9
-559.84	3.6785	15.6	16.9	17.6176	104.43	33.4	17.8	15
-559.83	3.6775	15.6	16.8	17.6176	104.43	33.3	17.7	14.9
-559.82	3.678	15.6	16.9	17.6177	104.43	33.5	17.7	14.9
-559.81	3.6785	15.6	16.8	17.6177	104.43	33.3	17.7	14.9
-559.8	3.678	15.6	16.9	17.6178	104.43	33.5	17.8	15.1
-559.79	3.678	15.6	16.9	17.6179	104.43	33.3	17.7	14.9
-559.78	3.678	15.6	16.9	17.618	104.429	33.5	17.7	15
-559.77	3.679	15.6	16.9	17.6181	104.429	33.3	17.7	14.9
-559.76	3.6785	15.6	16.9	17.6182	104.429	33.6	17.8	14.9
-559.75	3.678	15.7	16.8	17.6182	104.429	33.2	17.7	15
-559.74	3.678	15.7	16.9	17.6183	104.429	33.5	17.7	15
-559.73	3.679	15.6	16.9	17.6184	104.429	33.3	17.7	14.9
-559.72	3.6775	15.7	16.9	17.6185	104.429	33.4	17.8	15
-559.71	3.678	15.7	16.8	17.6186	104.429	33.3	17.7	14.9
-559.7	3.678	15.6	16.9	17.6187	104.429	33.4	17.8	15
-559.69	3.678	15.6	16.9	17.6187	104.429	33.3	17.7	14.9
-559.68	3.678	15.6	16.8	17.6188	104.429	33.4	17.8	15
-559.67	3.6785	15.6	16.8	17.6189	104.429	33.5	17.7	14.9
-559.66	3.678	15.6	16.9	17.619	104.429	33.3	17.7	14.9
-559.65	3.6785	15.6	16.8	17.6191	104.428	33.5	17.6	14.9
-559.64	3.6785	15.6	16.9	17.6192	104.428	33.4	17.7	15
-559.63	3.6775	15.3	16.8	17.6193	104.428	33.4	17.7	14.6
-559.62	3.6785	15.9	16.8	17.6194	104.428	32.4	17.6	15.2
-559.61	3.6785	15.2	16.9	17.6195	104.428	34.4	17.8	14.7
-559.6	3.678	15.9	16.8	17.6196	104.428	32.5	17.6	15.2
-559.59	3.679	15.3	16.8	17.6197	104.428	34.3	17.8	14.7
-559.58	3.6775	15.9	16.8	17.6198	104.428	32.4	17.6	15.2
-559.57	3.6785	15.2	16.9	17.6198	104.428	34.4	17.8	14.7
-559.56	3.678	15.9	16.8	17.6199	104.428	32.5	17.6	15.2
-559.55	3.6775	15.2	16.8	17.62	104.428	34.2	17.8	14.7
-559.54	3.6785	15.9	16.8	17.6201	104.428	32.6	17.6	15.2
-559.53	3.6785	15.2	16.9	17.6202	104.428	34.3	17.8	14.7
-559.52	3.678	15.9	16.9	17.6203	104.428	32.6	17.7	15.1
-559.51	3.678	15.2	16.9	17.6204	104.428	34.2	17.8	14.8
-559.5	3.6785	15.9	16.9	17.6205	104.428	32.2	17.7	15.1
-559.49	3.6785	15.2	16.9	17.6206	104.428	34.2	17.8	14.7
-559.48	3.678	15.9	16.8	17.6207	104.428	32.3	17.7	15.1
-559.47	3.6785	15.2	16.9	17.6208	104.428	34.5	17.7	14.7
-559.46	3.6785	15.9	16.8	17.6209	104.428	32.5	17.6	15.1
-559.45	3.678	15.2	16.9	17.621	104.427	34.4	17.8	14.7
-559.44	3.6785	15.9	16.9	17.6211	104.427	32.5	17.6	15.1
-559.43	3.678	15.2	16.9	17.6212	104.427	34.5	17.7	14.7
-559.42	3.6785	15.9	16.9	17.6213	104.427	32.4	17.6	15.1
-559.41	3.6785	15.2	16.8	17.6214	104.427	34.2	17.7	14.8
-559.4	3.678	15.9	16.9	17.6215	104.427	32.6	17.6	15.2
-559.39	3.678	15.2	16.8	17.6216	104.427	34.3	17.8	14.9
-559.38	3.678	15.9	16.9	17.6217	104.427	32.5	17.7	15.1
-559.37	3.678	15.2	16.8	17.6218	104.427	34.2	17.8	14.8
-559.36	3.678	15.9	16.9	17.6219	104.427	32.6	17.7	14.9
-559.35	3.6785	15.2	16.8	17.622	104.427	34	17.8	14.8
-559.34	3.6775	15.9	16.8	17.6221	104.427	32.7	17.7	15.1
-559.33	3.678	15.2	16.9	17.6222	104.427	34	17.7	14.8
-559.32	3.678	15.8	16.8	17.6223	104.427	32.8	17.7	15
-559.31	3.678	15.2	16.8	17.6224	104.427	34	17.7	14.8
-559.3	3.6785	15.9	16.8	17.6225	104.426	32.8	17.7	15.1
-559.29	3.6775	15.2	16.9	17.6226	104.426	33.9	17.7	14.8
-559.28	3.6785	15.9	16.9	17.6227	104.426	32.9	17.7	15
-559.27	3.678	15.2	16.9	17.6228	104.426	33.8	17.8	14.9
-559.26	3.678	15.8	16.8	17.6229	104.426	32.8	17.7	15.1
-559.25	3.678	15.2	16.9	17.623	104.426	33.8	17.8	14.8
-559.24	3.678	15.9	16.8	17.6231	104.426	33	17.7	15.1
-559.23	3.6785	15.2	16.9	17.6232	104.426	33.7	17.8	14.8
-559.22	3.678	15.9	16.8	17.6233	104.426	33	17.7	15.1
-559.21	3.6785	15.2	16.9	17.6234	104.426	33.6	17.7	14.7
-559.2	3.6785	15.9	16.9	17.6235	104.426	33.2	17.7	15.1
-559.19	3.678	15.2	16.8	17.6236	104.426	33.6	17.7	14.8
-559.18	3.6785	15.9	16.8	17.6237	104.426	33.2	17.7	15.1
-559.17	3.6775	15.2	16.8	17.6238	104.426	33.5	17.7	14.7
-559.16	3.678	15.9	16.9	17.624	104.426	33.2	17.7	15
-559.15	3.6785	15.2	16.9	17.6241	104.426	33.6	17.8	14.7
-559.14	3.678	15.9	16.9	17.6242	104.426	33.2	17.7	15.1
-559.13	3.6785	15.2	16.9	17.6242	104.426	33.5	17.8	14.7
-559.12	3.678	16	16.9	17.6244	104.426	33.2	17.7	15.1
-559.11	3.678	15.2	16.9	17.6245	104.426	33.6	17.8	14.7
-559.1	3.678	15.9	16.8	17.6246	104.425	33.2	17.7	15.1
-559.09	3.6785	15.2	16.9	17.6247	104.425	33.6	17.8	14.7
-559.08	3.6785	15.9	16.8	17.6248	104.425	33.2	17.7	15.3
-559.07	3.6785	15.2	16.9	17.6249	104.425	33.5	17.8	14.7
-559.06	3.6785	15.9	16.8	17.625	104.425	33.2	17.7	15.3
-559.05	3.6785	15.2	16.8	17.6251	104.425	33.6	17.7	14.5
-559.04	3.6785	15.9	16.9	17.6252	104.425	33.2	17.7	15.4
-559.03	3.6785	15.2	16.9	17.6253	104.425	33.6	17.8	14.5
-559.02	3.678	15.9	16.9	17.6254	104.425	33.1	17.7	15.3
-559.01	3.6775	15.2	16.8	17.6255	104.425	33.6	17.8	14.6
-559	3.678	15.8	16.8	17.6256	104.425	33.1	17.7	15.3
-558.99	3.678	15.2	16.9	17.6257	104.425	33.7	17.8	14.6
-558.98	3.6785	15.9	16.9	17.6258	104.425	33.1	17.7	15.3
-558.97	3.6785	15.2	16.8	17.6259	104.425	33.6	17.8	14.6
-558.96	3.6785	16	16.9	17.626	104.425	33.1	17.6	15.3
-558.95	3.678	15.2	16.8	17.6261	104.425	33.7	17.8	14.7
-558.94	3.678	15.9	16.9	17.6262	104.425	33.1	17.6	15.2
-558.93	3.678	15.2	16.9	17.6263	104.425	33.8	17.7	14.7
-558.92	3.679	15.9	16.9	17.6265	104.424	33	17.6	15.2
-558.91	3.6785	15.2	16.9	17.6266	104.424	33.7	17.8	14.7
-558.9	3.6785	15.8	16.9	17.6267	104.424	32.9	17.6	15.1
-558.89	3.6775	15.2	16.8	17.6268	104.424	33.8	17.8	14.7
-558.88	3.6785	15.9	16.9	17.6269	104.424	33	17.6	15.1
-558.87	3.6785	15.2	16.9	17.627	104.424	33.9	17.8	14.7
-558.86	3.6785	15.8	16.8	17.6271	104.424	33	17.6	15.2
-558.85	3.6785	15.2	16.9	17.6272	104.424	33.8	17.8	14.7
-558.84	3.678	15.9	16.9	17.6274	104.424	33	17.6	15.1
-558.83	3.678	15.2	16.9	17.6275	104.424	33.8	17.8	14.7
-558.82	3.678	15.8	16.8	17.6276	104.424	32.9	17.6	15.1
-558.81	3.6785	15.3	16.8	17.6277	104.424	33.8	17.7	14.7
-558.8	3.678	15.9	16.9	17.6278	104.424	33.1	17.7	15.1
-558.79	3.678	15.2	16.9	17.6279	104.424	33.8	17.7	14.8
-558.78	3.6785	15.8	16.8	17.628	104.424	33.1	17.7	15.1
-558.77	3.6785	15.2	16.8	17.6281	104.424	33.7	17.8	14.7
-558.76	3.6785	15.8	16.9	17.6282	104.424	33.1	17.6	15.1
-558.75	3.678	15.3	16.8	17.6283	104.424	33.8	17.8	14.8
-558.74	3.678	15.8	16.8	17.6284	104.424	33.1	17.6	15.2
-558.73	3.678	15.2	16.8	17.6285	104.423	33.7	17.7	14.7
-558.72	3.6785	15.8	16.8	17.6286	104.423	33	17.7	15.1
-558.71	3.678	15.2	16.9	17.6287	104.423	33.7	17.8	14.7
-558.7	3.678	15.8	16.9	17.6288	104.423	33.1	17.6	15.1
-558.69	3.6785	15.2	16.9	17.6289	104.423	33.6	17.9	14.7
-558.68	3.6785	15.8	16.8	17.6291	104.423	33.1	17.6	15.2
-558.67	3.6785	15.2	16.9	17.6291	104.423	33.5	17.8	14.7
-558.66	3.678	15.8	16.8	17.6293	104.423	33.2	17.7	15.2
-558.65	3.6785	15.2	16.9	17.6293	104.423	33.5	17.8	14.7
-558.64	3.678	15.9	16.9	17.6295	104.423	33.3	17.6	15.1
-558.63	3.6785	15.1	16.9	17.6296	104.423	33.4	17.8	14.8
-558.62	3.6785	15.9	16.8	17.6297	104.423	33.3	17.6	15.2
-558.61	3.6785	15.1	16.9	17.6298	104.423	33.4	17.8	14.7
-558.6	3.678	15.9	16.8	17.6299	104.423	33.3	17.6	15.2
-558.59	3.6785	15.2	16.9	17.63	104.423	33.5	17.8	14.7
-558.58	3.6785	15.9	16.9	17.6301	104.423	33.4	17.6	15.1
-558.57	3.6785	15.2	16.9	17.6302	104.423	33.5	17.8	14.7
-558.56	3.678	15.9	16.9	17.6303	104.422	33.3	17.7	15.2
-558.55	3.6785	15.1	16.9	17.6304	104.422	33.4	17.8	14.7
-558.54	3.678	15.9	16.8	17.6306	104.422	33.3	17.6	15.2
-558.53	3.6785	15.1	16.8	17.6307	104.422	33.4	17.8	14.7
-558.52	3.678	15.9	16.9	17.6308	104.422	33.2	17.7	15.2
-558.51	3.678	15.1	16.8	17.6309	104.422	33.4	17.7	14.7
-558.5	3.6785	15.9	16.9	17.631	104.422	33.3	17.6	15.1
-558.49	3.678	15.1	16.9	17.6311	104.422	33.4	17.8	14.7
-558.48	3.6785	15.9	16.9	17.6312	104.422	33.3	17.7	15.2
-558.47	3.678	15.2	16.8	17.6313	104.422	33.5	17.8	14.6
-558.46	3.6785	15.9	16.8	17.6314	104.422	33.3	17.7	15.2
-558.45	3.6785	15.1	16.8	17.6315	104.422	33.5	17.8	14.7
-558.44	3.678	15.9	16.9	17.6317	104.422	33.3	17.7	15.2
-558.43	3.6785	15.1	16.9	17.6317	104.422	33.4	17.7	14.7
-558.42	3.6785	15.9	16.9	17.6319	104.422	33.2	17.7	15.2
-558.41	3.678	15.2	16.9	17.6319	104.422	33.4	17.8	14.7
-558.4	3.6785	15.9	16.9	17.6321	104.422	33.2	17.6	15.2
-558.39	3.6785	15.2	16.9	17.6322	104.422	33.3	17.8	14.7
-558.38	3.678	15.9	16.8	17.6323	104.422	33.3	17.6	15.2
-558.37	3.6785	15.1	16.8	17.6324	104.422	33.3	17.7	14.7
-558.36	3.6785	15.9	16.9	17.6325	104.422	33.3	17.7	15.3
-558.35	3.678	15.2	16.9	17.6326	104.421	33.2	17.8	14.7
-558.34	3.6785	15.9	16.9	17.6327	104.421	33.2	17.7	15.2
-558.33	3.6785	15.2	16.9	17.6329	104.421	33.2	17.7	14.7
-558.32	3.6785	16	16.9	17.633	104.421	33.3	17.7	15.2
-558.31	3.678	15.2	16.8	17.6331	104.421	33.1	17.7	14.7
-558.3	3.6785	15.9	16.8	17.6332	104.421	33.3	17.6	15.2
-558.29	3.6785	15.2	16.9	17.6333	104.421	33.1	17.8	14.8
-558.28	3.678	15.8	16.9	17.6334	104.421	33.3	17.6	15.2
-558.27	3.679	15.2	16.9	17.6335	104.421	33.1	17.8	14.7
-558.26	3.678	15.8	16.9	17.6336	104.421	33.2	17.7	15.2
-558.25	3.6785	15.2	16.8	17.6337	104.421	33.1	17.8	14.7
-558.24	3.6785	15.8	16.9	17.6338	104.421	33.2	17.7	15.2
-558.23	3.678	15.2	16.9	17.6339	104.421	33.1	17.8	14.7
-558.22	3.6785	15.8	16.8	17.634	104.421	33.3	17.7	15.2
-558.21	3.678	15.2	16.9	17.6341	104.421	33	17.8	14.7
-558.2	3.678	15.9	16.9	17.6342	104.421	33.4	17.7	15.1
-558.19	3.6785	15.3	16.8	17.6344	104.421	33.1	17.7	14.8
-558.18	3.679	15.8	16.8	17.6345	104.421	33.3	17.7	15.1
-558.17	3.6785	15.3	16.8	17.6346	104.421	33	17.8	14.7
-558.16	3.678	15.8	16.8	17.6347	104.422	33.4	17.7	15.1
-558.15	3.6785	15.2	16.9	17.6348	104.422	32.9	17.8	14.8
-558.14	3.6785	15.9	16.9	17.6349	104.422	33.5	17.6	15.1
-558.13	3.678	15.2	16.9	17.635	104.422	32.9	17.8	14.8
-558.12	3.6785	15.9	16.9	17.6352	104.422	33.5	17.7	15.2
-558.11	3.6775	15.3	16.8	17.6353	104.422	33.1	17.8	14.8
-558.1	3.6785	15.8	16.9	17.6354	104.422	33.6	17.7	15.1
-558.09	3.6785	15.3	16.9	17.6355	104.422	33	17.7	14.8
-558.08	3.6785	15.8	16.9	17.6356	104.422	33.4	17.7	15.1
-558.07	3.678	15.2	16.9	17.6357	104.422	33.2	17.7	14.8
-558.06	3.678	15.9	16.9	17.6358	104.422	33	17.7	15.1
-558.05	3.6785	15.3	16.9	17.6359	104.422	33.8	17.8	14.8
-558.04	3.6785	15.8	16.8	17.6361	104.422	32.8	17.7	15.1
-558.03	3.678	15.2	16.9	17.6362	104.422	34	17.8	14.8
-558.02	3.6785	15.8	16.9	17.6363	104.422	32.5	17.6	15.1
-558.01	3.678	15.2	16.9	17.6364	104.422	34.1	17.8	14.7
-558	3.678	15.8	16.9	17.6365	104.422	32.5	17.7	15.1
-557.99	3.6785	15.2	16.8	17.6366	104.422	33.9	17.8	14.8
-557.98	3.6785	15.9	16.9	17.6367	104.422	32.7	17.7	15.1
-557.97	3.678	15.2	16.9	17.6368	104.422	33.5	17.8	14.8
-557.96	3.6785	15.9	16.9	17.637	104.422	32.5	17.7	15.1
-557.95	3.678	15.1	16.8	17.6371	104.422	33.7	17.8	14.8
-557.94	3.6785	16	16.8	17.6372	104.422	32.7	17.7	15.1
-557.93	3.678	15.2	16.8	17.6373	104.422	33.5	17.8	14.8
-557.92	3.6785	15.9	16.8	17.6374	104.422	32.8	17.7	15.1
-557.91	3.678	15.2	16.9	17.6375	104.422	33.5	17.8	14.8
-557.9	3.6785	16	16.9	17.6377	104.423	33	17.7	15.2
-557.89	3.6785	15.1	16.9	17.6377	104.423	33.4	17.8	14.7
-557.88	3.6785	15.9	16.9	17.6379	104.423	33	17.7	15.2
-557.87	3.6785	15.1	16.9	17.638	104.423	33.4	17.8	14.7
-557.86	3.6785	15.9	16.9	17.6381	104.423	32.8	17.7	15.2
-557.85	3.6785	15.1	16.9	17.6382	104.423	33.4	17.8	14.7
-557.84	3.678	15.9	16.8	17.6383	104.423	32.8	17.7	15.2
-557.83	3.6785	15.1	16.8	17.6384	104.423	33.4	17.7	14.7
-557.82	3.678	16	16.9	17.6385	104.423	32.7	17.7	15.2
-557.81	3.678	15.1	16.8	17.6386	104.423	33.3	17.8	14.6
-557.8	3.6785	15.9	16.9	17.6388	104.423	32.7	17.7	15.3
-557.79	3.6785	15.2	16.9	17.6389	104.423	33.3	17.8	14.6
-557.78	3.678	15.9	16.9	17.639	104.423	32.6	17.8	15.2
-557.77	3.6785	15.2	16.8	17.6391	104.423	33.3	17.9	14.6
-557.76	3.6785	15.9	16.9	17.6393	104.423	32.7	17.7	15.2
-557.75	3.678	15.1	16.9	17.6394	104.423	33.3	17.8	14.7
-557.74	3.678	15.9	16.9	17.6395	104.423	32.7	17.7	15.2
-557.73	3.678	15.2	16.8	17.6396	104.423	33.3	17.8	14.6
-557.72	3.678	15.9	16.9	17.6397	104.423	32.7	17.7	15.2
-557.71	3.678	15.2	16.8	17.6398	104.423	33.3	17.8	14.7
-557.7	3.6785	15.9	16.9	17.64	104.423	32.8	17.7	15.2
-557.69	3.6785	15.2	16.9	17.6401	104.423	33.2	17.8	14.7
-557.68	3.678	15.8	16.9	17.6402	104.423	32.8	17.7	15.2
-557.67	3.6785	15.2	16.8	17.6403	104.423	33.2	17.8	14.6
-557.66	3.678	15.8	16.9	17.6404	104.424	32.9	17.7	15.2
-557.65	3.6785	15.3	16.8	17.6405	104.424	33.1	17.7	14.7
-557.64	3.6775	15.7	16.9	17.6406	104.424	32.8	17.7	15.2
-557.63	3.6785	15.2	16.8	17.6407	104.424	33	17.8	14.7
-557.62	3.6775	15.7	16.9	17.6409	104.424	32.8	17.6	15.2
-557.61	3.678	15.3	16.9	17.641	104.424	33	17.7	14.7
-557.6	3.6775	15.6	16.8	17.6411	104.424	32.8	17.6	15.1
-557.59	3.6785	15.4	16.9	17.6412	104.424	33	17.8	14.7
-557.58	3.678	15.7	16.9	17.6413	104.424	32.8	17.7	15.2
-557.57	3.6785	15.3	16.9	17.6414	104.424	32.9	17.7	14.8
-557.56	3.678	15.7	16.9	17.6416	104.424	32.6	17.7	15.1
-557.55	3.678	15.4	16.8	17.6417	104.424	32.9	17.8	14.8
-557.54	3.678	15.6	16.8	17.6418	104.424	32.6	17.7	15.1
-557.53	3.6785	15.4	16.9	17.6419	104.424	32.8	17.8	14.9
-557.52	3.678	15.7	16.9	17.642	104.424	32.6	17.7	15
-557.51	3.678	15.4	16.8	17.6421	104.424	32.8	17.8	14.8
-557.5	3.678	15.6	16.8	17.6423	104.424	32.5	17.7	15
-557.49	3.678	15.4	16.8	17.6424	104.424	32.6	17.8	14.8
-557.48	3.6785	15.7	16.8	17.6425	104.424	32.4	17.7	15
-557.47	3.678	15.3	16.9	17.6426	104.424	32.4	17.8	14.8
-557.46	3.678	15.8	16.9	17.6428	104.424	32.3	17.7	15
-557.45	3.678	15.3	16.9	17.6429	104.424	32.3	17.8	14.8
-557.44	3.678	15.8	16.8	17.643	104.424	32.1	17.7	14.9
-557.43	3.6785	15.2	16.8	17.6431	104.424	32.1	17.8	14.9
-557.42	3.6785	15.8	16.8	17.6433	104.424	32	17.7	15
-557.41	3.6785	15.3	16.9	17.6434	104.424	31.9	17.8	14.9
-557.4	3.6785	15.8	16.8	17.6435	104.424	31.9	17.7	15
-557.39	3.6785	15.2	16.9	17.6436	104.424	31.9	17.8	14.8
-557.38	3.6785	15.7	16.9	17.6438	104.424	31.9	17.7	15.1
-557.37	3.678	15.3	16.9	17.6439	104.424	32	17.8	14.8
-557.36	3.678	16	16.9	17.644	104.424	32	17.7	15.1
-557.35	3.678	15.1	16.9	17.6441	104.424	32	17.8	14.8
-557.34	3.6785	16.1	16.9	17.6443	104.424	31.9	17.7	15.1
-557.33	3.6785	15.2	16.9	17.6444	104.424	32	17.8	14.8
-557.32	3.6775	15.8	16.9	17.6445	104.424	31.8	17.6	15.1
-557.31	3.678	15	16.9	17.6447	104.424	32	17.8	14.8
-557.3	3.678	16.1	16.9	17.6448	104.424	31.8	17.7	15.1
-557.29	3.6785	15.1	16.8	17.6449	104.423	32	17.8	14.8
-557.28	3.678	16.1	16.9	17.6451	104.423	31.9	17.7	15.1
-557.27	3.678	15	16.9	17.6452	104.423	32	17.7	14.8
-557.26	3.678	16.1	16.9	17.6453	104.423	31.9	17.6	15.1
-557.25	3.678	14.9	16.9	17.6455	104.423	32.1	17.7	14.8
-557.24	3.678	16	16.8	17.6456	104.423	31.9	17.7	15.1
-557.23	3.678	15.1	16.9	17.6457	104.423	32.2	17.8	14.8
-557.22	3.678	16.1	16.8	17.6459	104.423	32	17.7	15.2
-557.21	3.678	14.8	16.8	17.646	104.423	32.1	17.8	14.8
-557.2	3.678	16	16.9	17.6461	104.423	31.9	17.7	15.1
[truncated: 96,002 more rows]
